1 **Association between lockdown and changes in**  
2 **subspecies diversity with a focus on *Haemophilus***  
3 ***influenzae* and *Staphylococcus aureus***  
4

5 Slim Hmidi<sup>1,2</sup>, Nadim Cassir<sup>1,3,4</sup>, Philippe Colson<sup>1,3,4</sup>, Raymond Ruimy<sup>5,6</sup>, Hervé Chaudet<sup>1,2,4\*</sup>

6  
7 <sup>1</sup> IHU Méditerranée Infection, Marseille, France

8 <sup>2</sup> Aix Marseille Université, Institut de Recherche pour le Développement (IRD), Assistance  
9 Publique– Hôpitaux de Marseille (AP-HM), Service de Santé des Armées (SSA), Vecteurs –  
10 Infections Tropicales et Méditerranéennes (VITROME), Marseille, France.

11 <sup>3</sup> Aix-Marseille Université, Institut de Recherche pour le Développement (IRD), Microbes  
12 Evolution Phylogeny and Infections (MEPHI), Marseille, France

13 <sup>4</sup> Assistance Publique- Hôpitaux de Marseille (AP-HM), Marseille, France

14 <sup>5</sup> Université Côte d’Azur, Inserm, U1065, C3M, Nice, France

15 <sup>6</sup> Department of Bacteriology, Université Côte d’Azur, CHU Nice, Nice, France

16

17 \* Corresponding author

18 E-mail :herve.chaudet@ap-hm.fr

19

20

## 21 **Abstract**

22 **Background:** The social distancing measures implemented to curb SARS-CoV-2  
23 transmission provided a unique opportunity to study the association between reduced human  
24 interaction and epidemiological changes related to human bacterial pathogens. While studies  
25 have indicated a decrease in respiratory infections during lockdowns, further description is  
26 needed regarding the changes in the incidence of bacterial populations. This study investigates  
27 the changes in strain richness of community infections with two bacterial species,  
28 *Haemophilus influenzae* and *Staphylococcus aureus* during the waning related to France's  
29 social distancing measures, especially lockdown.

30 **Methods:** MALDI-TOF MS spectra analyses of routine clinical bacterial identifications were  
31 used as proxies for genomic analyses. Spectra from lockdown and reference periods were  
32 compared using unsupervised classification methods. A total of 251 main spectrum profiles of  
33 *H. influenzae*, 2079 main spectrum profiles of *S. aureus* for respiratory tract and blood  
34 samples, and 414 main spectrum profiles for skin samples of *S. aureus* were examined. Data  
35 were analyzed using hierarchical clustering, binary discriminant analysis, and statistical tests  
36 for significance.

37 **Results:** The strain mix of both bacteria during the lockdown was deeply altered, but with  
38 different further evolutions. *H. influenzae* exhibited a shift in spectra composition, with a  
39 subsequent return towards pre-lockdown diversity observed in 2021. In contrast, *S. aureus*  
40 exhibited a persistent change in spectra composition, with a gradual return to pre-lockdown  
41 patterns one year later.

42 **Conclusions:** Hindering inter-human transmission, as was done during the lockdown  
43 measures, was associated with significant alterations in bacterial species compositions, with

44 differential impacts observed for *H. influenzae* and *S. aureus*. This study provides data on the  
45 putative relationship between genetic diversity and transmission dynamics during a public  
46 health crisis. Describing the dynamics of bacterial populations during lockdowns could  
47 contribute providing information for the implementation of future strategies for infectious  
48 disease control and surveillance.  
49

## 50 Introduction

51 To hinder the spread of the SARS-CoV-2 outbreak, several restrictive measures have  
52 been carried out worldwide, including population lockdowns to prevent viral transmission. In  
53 France, a general lockdown of the population was enforced from March 17<sup>th</sup> to May 11<sup>th</sup>,  
54 2020, for curbing the outbreak curve. This unprecedented situation can be considered as a  
55 real-scale experiment to assess the changes in the epidemiology of infectious agents when  
56 hindering human-to-human transmissions. This measure has been followed by less restrictive  
57 ones, as restrictions on gatherings and human mobility, use of personal protective equipment.  
58 However, the barrier gestures were less respected from summer 2020, allowing several  
59 epidemic waves.

60 Several studies have investigated the consequences of measures against the spread of  
61 SARS-CoV-2 on the incidence of other pathogens, mainly focusing on paediatric infections.  
62 Rotulo *et al.* demonstrated a reduction in community-acquired respiratory infections observed  
63 in a paediatric emergency department in Genoa, Italy, during the lockdown period 1. Similar  
64 results were also reported by Vierucci *et al.* in Tuscany 2.

65 A recent study examining invasive infections caused by *Streptococcus pneumoniae*,  
66 *Haemophilus influenzae* or *Neisseria meningitidis* across 26 countries during the early months  
67 of 2020 (from January 1 to May 31) retrieved a significant and prolonged decrease in invasive  
68 diseases due to these bacteria. These incidence reductions coincided with the implementation  
69 of COVID-19 containment measures in each respective region 3. Similarly, a study  
70 investigating the lockdown consequences on non-viral infectious agents observed significant  
71 changes in the relative abundance of several bacterial species, including a decrease in  
72 *Escherichia coli*, *S. pneumoniae*, and *H. influenzae* 4.

73 All these studies suggested a quantitative alteration of bacterial presence in the human  
74 population, with a decrease in species abundances. Interhuman transmission events have two

75 dimensions: contact rate and inoculum size, constituting the transmission bottleneck. The  
76 lockdown, aimed at stopping or hindering the interhuman transmission, might result in small  
77 bottlenecks. Previous studies have shown that small bottlenecks were associated with  
78 substantially different levels of bacterial diversity in the transmission target, in terms of clonal  
79 richness, due to stochastic effects 5. Evaluating the epidemiological changes at the waning of  
80 the lockdown on human-related bacterial populations therefore need to assess species clonal  
81 richness over time.

82 Studies of bacteria subspecies optimally rely on costly genomic analyses. However,  
83 MALDI-TOF spectra analyses may act as proxies of genomic analyses. Routine  
84 identifications of bacterial species using MALDI-TOF (Matrix-Assisted Laser  
85 Desorption/Ionization Time-of-Flight) mass spectrometry are based on the presence of  
86 species' characteristic peaks 6, a kind of 'fingerprint recognition', even if characteristic peak  
87 correspondence is not known 7. Identification may even delve deeper than the species level by  
88 the mean of supplementary peaks capable of identifying clonal complexes, frequently used for  
89 outbreak investigation and clonal characterization 8-11. We previously demonstrated 12 that  
90 MALDI-TOF spectra have sufficient richness and expressivity to allow for sub-species  
91 differentiations. On this basis, we have developed a set of original numerical and statistical  
92 processing tools for analyzing routine identification spectra to search for possible clonal  
93 complexes for epidemiologic surveillance purposes 13.

94 In this work we used these tools to address the following questions: what were the  
95 changes at the waning of the lockdown-related on species' incidence and their clonal  
96 richness? Were these changes similar across bacterial species and samplings? This work  
97 specifically focused on *H. influenzae* and *Staphylococcus aureus*, species with enough  
98 identifications.

## 99 **Materials and methods**

### 100 **Experimental design**

101 The experimental design of this study aimed to compare MALDI-TOF spectra of  
102 *Haemophilus influenzae* and *Staphylococcus aureus* produced during the 8-week lockdown  
103 period with 8-week reference periods before and after, for identifying alterations in spectra  
104 clustering. This general framework was used to develop two protocols: the first protocol  
105 compared the lockdown period to the periods immediately before and following it within the  
106 same year, while the second protocol compared the lockdown period to the same one during  
107 2019 and 2021.

### 108 **Materials**

109 The Institut Hospitalo-Universitaire Méditerranée Infection (IHUMI) has a database of  
110 1.270 million MALDI-TOF MS spectra carried out since 2011 for routine bacterial  
111 identification in the AP-HM, mostly from regional patient recruitment. All spectra were done  
112 using three Bruker Microflex mass spectrometers following the standardized protocol  
113 provided by Bruker Daltonics. A single colony or sediment was applied directly to two  
114 separate spots on crushed, air-dried steel targets coated with 1  $\mu$ L of a matrix solution of  $\alpha$ -  
115 cyano-4-hydroxycinnamic acid saturated in 50% acetonitrile and 2.5% trifluoroacetic acid,  
116 and air dried for 5 min. Spectrum acquisitions were controlled using FlexControl software.  
117 The Bruker Bacterial Test Standard (BTS) calibration was routinely used according to Bruker  
118 instructions. For each plate, BTS was used as a positive control and an uninoculated matrix  
119 solution was used as a negative control. Identification of bacterial species was given using the  
120 Biotyper software with species-level identification when the log (score) was  $\geq 2.0$ . All  
121 MALDI-TOF spectra produced by the automated systems were loaded into a database, along  
122 with the corresponding biological sample information (pseudonymised patient demographics

123 and stay characteristics, sample characterization, requesting unit, species identification,  
124 antibiogram).

## 125 **Inclusion criteria**

126 We included spectra from routine clinical bacterial identification of *H. influenzae* and *S.*  
127 *aureus*, corresponding to upper respiratory tract and blood culture specimens for the two  
128 species and skin specimens for *S. aureus*. All samples were coming from community  
129 infections. We retained spectra with existing positive plate control and belonging to the 5  
130 study periods: lockdown (March 17-May 11, 2020), pre-lockdown 2020 (January 27-March  
131 16, 2020), post-lockdown (May 12-July 7, 2020), baseline 2019 (March 17-May 11, 2019),  
132 baseline 2021 (March 17-May 11, 2021). The spectra were deduplicated by hospital stay and  
133 clinical sample kind.

## 134 **MALDI-TOF MS analysis**

135 The matrix gathering the intensities of the significant peaks was set up as recommended  
136 by S. Gibb 14. For spectra normalization we used a process flow made of intensity  
137 transformation (square root), smoothing (moving average with half window size 12), baseline  
138 correction (Statistics-sensitive Non-linear Iterative Peak-clipping algorithm, 100 iterations),  
139 and intensity recalibration on the peak of maximum intensity. Throughout this process, a  
140 signal-to-noise ratio (SNR) of 3 was utilized. The technical replicates were merged (averaging  
141 method) into main spectra profiles (msp), and species-specific peaks were removed to increase  
142 the contrast between spectra, as outlined in 12.

143 Our analysis was based on unsupervised classification, aiming at finding possible links  
144 between spectra compositions and their corresponding periods. Following the protocol we  
145 have described for epidemiological surveillance 13, we employed an ascendent hierarchical  
146 classification using Bray-Curtis distances between spectra, with Ward agglomeration and

147 Gruveaus-Wainer ordination. The leaves of the dendrograms were color-coded to denote  
148 period membership (green: before the lockdown period, red: during, black: after, regardless of  
149 the protocol). During dendrogram analysis, the optimal number of clusters was determined  
150 using the Rousseeuw's silhouette method 15, the homogeneity of period distribution among  
151 the clusters was tested using the chi2 or Fisher test, the grouping of lockdown strains was  
152 assessed using the Wald-Wolfowitz Runs Test (WWRT) 16, and we have systematically  
153 tested the proximity of lockdown and post-lockdown strains with Unconditional Barnard's  
154 unilateral Exact Test (BET) on nearest neighbour counts, which is particularly suited to 2x2  
155 table of counts 17. The most discriminating peaks between clusters were identified using the  
156 Gibb and Strimmer's binary discriminant analysis 18.

157 The analysis was done using R and the packages MALDIquant v1.16.2, Seriation v1.2-2  
158 for dendrogram ordering, BinDA v1.0.3 for binary discriminant analysis, and Vegan for  
159 distance metrics.

## 160 **Ethical approval statement**

161 The surveillance system is in conformance with the Regulation (EU) 2016/679 of the  
162 European Parliament and of the Council of 27 April 2016 on the protection of natural persons  
163 with regard to the processing of personal data and on the free movement of such data, and  
164 repealing Directive 95/46/EC (General Data Protection Regulation), declared on the  
165 RGPD/AP-HM register with number 2019-73 ("Epidemiological monitoring of potentially  
166 pathogenic microorganisms"). The study SpectraSurv was approved by the *Commission*  
167 *Nationale Informatique et Libertés* (decision DR-2018-177). The data were accessed for  
168 research purposes during June 2022, and authors had no access to information that could  
169 identify individual participants during or after data collection.



## 170 RESULTS

### 171 *Haemophilus Influenzae*

#### 172 Comparison with reference periods from the same year

173 We analysed 283 *H. influenzae* spectra grouped into 140 msp, and distributed as  
174 follows: 72 before lockdown (51.4% of all msp), 17 during lockdown (12.1%), 51 after  
175 lockdown (36.5%) (Fig 1a, colouring in accordance with the schema presented in the  
176 methods). According Rousseeuw's methods, the dendrogram was partitioned into 5 clusters,  
177 heterogeneous in their composition regarding the periods, and contrasted by the presence of  
178 most of the lockdown samples in the lower subtree (Fisher test:  $p=0.0055$ ). There was no  
179 grouping of lockdown strains together (WWRT=-1.96,  $p=0.051$ ), but we observed a closer  
180 proximity of lockdown spectra with post-lockdown spectra (BET=-2.02,  $p=0.028$ )

181  
182 **Fig 1: Results of the analysis of *H. influenzae* spectra from the same year.** a) Dendrogram of the  
183 140 main spectra profiles. The colour scale shows the distribution of the leaves over time: before  
184 lockdown (green), during lockdown (red) and after lockdown (black). The dotted line corresponds to  
185 the cut height for the optimal number of clusters. b) Binary discriminant analysis showing the 40  
186 highest ranked peaks contrasting the lockdown period with the 8 weeks periods before and after  
187 lockdown. Peaks are indicated by their m/z. For each selected peak, the entropic t-score ranking is  
188 shown, positive when the peak is present in the group.

189  
190 A binary discriminant analysis directly contrasting the spectra from the three periods  
191 showed an opposition of lockdown and pre-lockdown most discriminant peaks, with an  
192 important similarity of lockdown and post-lockdown periods (Fig 1b). This finding was in  
193 accordance with the proximity of spectra belonging to these two periods observed on the

194 dendrogram and suggests that clonal complexes were replaced during the lockdown by new  
195 ones, persisting after the lockdown.

## 196 **Comparison with years 2019 and 2021**

197 We studied 260 spectra grouped into 128 msp, 73 (58.1%) from 2019, 19 (11.2%) from  
198 lockdown (2020), and 36 (30.7%) from 2021. The 3 clusters of the dendrogram (Fig 2a) were  
199 heterogeneous according to the period distributions with a single cluster gathering 13/19  
200 lockdown strains ( $\text{Chi}^2=12.015$ ,  $p=0.017$ ), and showed a grouping of the samples from the  
201 lockdown period ( $\text{WWRT}=-4.02$ ,  $p=5.86 \cdot 10^{-5}$ ). However, there was no privileged tying of  
202 lockdown strains with post-lockdown strains ( $\text{BET}=-1.37$ ,  $p=0.097$ ).

203

204 **Fig 2: Results of the analysis of *H. influenza* spectra from the same period of the 3 years. a)**  
205 Dendrogram of the 128 main spectra profiles. The colour scale shows the distribution of leaves over  
206 time: 2019 (green), 2020 (red) and 2021 (black). The dotted line corresponds to the cut height for the  
207 optimal number of clusters. **b)** Binary discriminant analysis showing the 40 highest ranked peaks  
208 contrasting the three yearly periods during 2019, 2020 (lockdown), and 2021. Peaks are indicated by  
209 their m/z. For each selected peak, the entropic t-score ranking is shown, positive when the peak is  
210 present in the group.

211

212 The binary discriminant analysis of the peaks contrasting these 3 periods (Fig 2b)  
213 showed that the most discriminating peaks appeared during the lockdown, but with a tendency  
214 during 2021 to return to the 2019 situation with an intermediate configuration. This result,  
215 associated with the absence of tying in the dendrogram, suggests that the clonal complex  
216 replacement observed during year 2020 was transient, with a slow and partial return to the  
217 pre-lockdown state. The two binary discriminant analyses shared 19/40 most discriminant  
218 peaks, showing a relative stability of the peaks supporting the discrimination.

## 219 *Staphylococcus aureus*

220 For this species we also examined skin samples in addition to respiratory samples, due  
221 to the importance of the transmission mode by direct contact.

### 222 **Respiratory tract and blood samples**

#### 223 **Comparison with reference periods from the same year**

224 We analysed 2147 spectra grouped into 1019 msp of *S. aureus* distributed as follows:  
225 410 msp before lockdown represented in green (44.57% of the spectra), 200 msp during  
226 lockdown represented in red (18.37 %), 409 msp after lockdown represented in black  
227 (37.06%) (Fig 3a). Silhouette analysis of this dendrogram selected 6 clusters, heterogeneous  
228 according to the period distribution, with a single cluster having 32% of its strains belonging  
229 to the lockdown period and gathering 46% of these strains ( $\text{Chi}^2=64.87$ ,  $p=4.3 \cdot 10^{-10}$ ).  
230 Lockdown strains were particularly grouped according to their spectra similarity ( $\text{WWRT}=-$   
231  $10.685$ ,  $p<2.2 \cdot 10^{-16}$ ). However, there was no privileged tying of lockdown strains with post-  
232 lockdown strains ( $\text{BET}=0.10$ ,  $p=0.48$ ).

233  
234 **Fig 3: Results of the analysis of *S. aureus* spectra from respiratory tract and blood samples of the**  
235 **same year. a)** Dendrogram of the 1019 main spectra profiles. The colour scale shows the distribution  
236 of the leaves over time: before lockdown (green), during lockdown (red) and after lockdown (black).  
237 The dotted line corresponds to the cut height for the optimal number of clusters. **b)** Binary  
238 discriminant analysis of main spectra profiles showing the 40 highest ranked peaks contrasting the  
239 lockdown period with the 8 weeks periods before and after lockdown. Peaks are indicated by their  
240 m/z. For each selected peak, the entropic t-score ranking is shown, positive when the peak is present in  
241 the group.

242  
243 Like *H. influenzae*, the binary discriminant analysis comparing the spectra  
244 corresponding to the three periods (before, during, after lockdown) showed an opposition of

245 the most discriminating peaks between the pre-lockdown and the lockdown period (Fig 3b).  
246 However, this opposition no more persisted during the post-lockdown period, with a partial  
247 evolution toward the pre-lockdown spectra characteristics.

#### 248 **Comparison with years 2019 and 2021**

249 We analysed 2653 spectra grouped into 1260 msp of *S. aureus* distributed as follows:  
250 475 (37.7%) msp from 2019, 200 (15.9%) msp from the lockdown period, 585 (46.4%) msp  
251 from 2021. Among the 3 dendrogram's clusters confirmed by the silhouette analysis (Fig 4a),  
252 the middle one is characterised by a predominance of lockdown and post-lockdown strains at  
253 the expense of pre-lockdown ones ( $\text{Chi}^2=79.801$ ,  $p<2.2 \cdot 10^{-16}$ ). As for the previous  
254 comparison, the lockdown strains were particularly grouped according to their spectra  
255 similarity ( $\text{WWRT}=-13.782$ ,  $p<2.2 \cdot 10^{-16}$ ), and we found a tying of lockdown and post-  
256 lockdown strains ( $\text{BET}=2.315$ ,  $p=0.011$ ).

257

258 **Fig 4: Results of the analysis of *S. aureus* spectra from respiratory tract and blood samples of the**  
259 **same period over the 3 years. a)** Dendrogram of the 1260 main spectra profiles. The colour scale  
260 shows the distribution of leaves over time: 2019 (green), 2020 (red) and 2021 (black). The dotted line  
261 corresponds to the cut height for the optimal number of clusters. **b)** Binary discriminant analysis of  
262 main spectra profiles showing the 40 highest ranked peaks contrasting the three yearly periods during  
263 2019, 2020 (lockdown), and 2021. Peaks are indicated by their m/z. For each selected peak, the  
264 entropic t-score ranking is shown, positive when the peak is present in the group.

265

266 The overall binary discriminant analysis (Fig 4b) showed a similarity between  
267 lockdown and 2021 and a difference from 2019, suggesting a persistence of the changes  
268 observed during the lockdown on the protein composition of *S. aureus*, which seems to agree  
269 with the results of the comparison between before and after it during the same year. The two

270 binary discriminant analyses shared 21/40 most discriminant peaks, showing a stability of the  
271 peaks supporting the discrimination.

## 272 **Skin Samples**

### 273 **Comparison with reference periods from the same year**

274 This study analysed 367 msp including 177 msp before lockdown represented in green  
275 (48.2% of the spectra), 51 msp during lockdown represented in red (13.9 %), 139 msp after  
276 lockdown represented in black (37.9%). The silhouette analysis found three optimal clusters  
277 (Fig 5a) in the dendrogram, with a middle cluster having few lockdown strains ( $\text{Chi}^2=10.949$ ,  
278  $p=0.027$ ). Samples from the lockdown period were grouped by the clustering process of their  
279 spectra ( $\text{WWRT}=-8.506$ ,  $p<2.2 \cdot 10^{-16}$ ). We also noticed that spectra from pre-lockdown and  
280 post-lockdown samples were distributed over the dendrogram, without protein proximity  
281 between lockdown and post-lockdown periods ( $\text{BT}=-1.509$ ,  $p=0.07$ ).

282

### 283 **Fig 5: Results of the analysis of *S. aureus* spectra from skin samples of the same year. a)**

284 Dendrogram of the 367 main spectra profiles. The colour scale shows the distribution of the leaves  
285 over time: before lockdown (green), during lockdown (red) and after lockdown (black). The dotted  
286 line corresponds to the cut height for the optimal number of clusters. **b)** Binary discriminant analysis  
287 of main spectra profiles showing the 40 highest ranked peaks contrasting the lockdown period with the  
288 8 weeks periods before and after lockdown. Peaks are indicated by their m/z. For each selected peak,  
289 the entropic t-score ranking is shown, positive when the peak is present in the group.

290

291 Unlike the previous comparison, the binary discriminant analysis (Fig 5b) showed a  
292 similarity of the distribution of the most discriminant peaks between pre and post lockdown  
293 spectra, contrasting with the lockdown period, which indicates that the changes during  
294 lockdown on the spectra composition of *S. aureus* were transitory.

## 295 **Comparison with years 2019 and 2021**

296 We analysed 605 spectra grouped into 288 msp of *S. aureus* distributed as follows: 221  
297 (76.8%) msp from 2019, 51 (17.7%) msp from 2020, 16 (5.5%) msp from 2021. The two  
298 optimal clusters of the dendrogram (Fig 6a) presented a homogeneous distribution of the  
299 periods (Fisher Exact Test:  $p=0.656$ ), but with a strong grouping of the lockdown strains  
300 (WWRT=-10.362,  $p<2.2 \cdot 10^{-16}$ ) and a statistical association between lockdown and post-  
301 lockdown spectra despite the small amount of the last ones (BET=-1.715,  $p=0.048$ ).

302

303 **Fig 6: Results of the analysis of *S. aureus* spectra from skin samples of the same period over the**  
304 **3 years. a)** Dendrogram of the 1019 main spectra profiles. The colour scale shows the distribution of  
305 leaves over time: 2019 (green), 2020 (red) and 2021 (black). The dotted line corresponds to the cut  
306 height for the optimal number of clusters. **b)** Binary discriminant analysis of main spectra profiles  
307 showing the 40 highest ranked peaks contrasting the three yearly periods during 2019, 2020  
308 (lockdown), and 2021. Peaks are indicated by their m/z. For each selected peak, the entropic t-score  
309 ranking is shown, positive when the peak is present in the group..

310

311 The overall binary analysis (Fig 6b) showed a similarity between lockdown and 2021  
312 and a difference from 2019, suggesting a persistence of changes that occurred during the  
313 waning due to the lockdown on the protein composition of *S. aureus*, which seems to  
314 contradict the results of the comparison between before and after and during the same year,  
315 but agrees with the results of comparison with reference period from 2019 and 2021 for the  
316 respiratory tract and blood samples. The two binary discriminant analyses shared 14/40 most  
317 discriminant peaks, showing a change in the peaks supporting the discrimination.

## 318 Discussion

319 Our objective was to evaluate the changes in bacterial species incidence during the  
320 waning due to the lockdown and associated social distancing measures, and their association  
321 with their clonal richness. This study focused on community strains of *Haemophilus*  
322 *influenzae* and *Staphylococcus aureus*, two species for which a notable and prolonged  
323 decrease was observed throughout this period. Bacterial identifications from blood and  
324 respiratory tract were pooled, as previous studies indicated that strains coming from these two  
325 kinds of samples could not be distinguished in most cases 19. Additionally, identifications of  
326 *S. aureus* from cutaneous samples were explored for comparison, as they are influenced by  
327 non-human transmissions 20. To our knowledge, no similar study, focusing on bacteria  
328 subspecies diversity, has been conducted thus far. For this purpose, we used MALDI-TOF  
329 MS, which is used for routine identification of bacterial species, and which is cost-effective  
330 compared to classic genotyping methods 21. This was possible because, in addition to  
331 species-specific peaks, MALDI-TOF MS spectra exhibit clusters of frequently co-occurring  
332 peaks, enabling subspecies differentiation 12.

333 This study included 251 msp of *H. Influenzae* and 2683 msp (2079 from respiratory  
334 sample, 604 from skin samples) of *S. aureus*, representing all identifications of these two  
335 species made during the included periods. All identifications were obtained from the routine  
336 work of the clinical microbiology laboratories of the four university hospitals of the  
337 Assistance Publique-Hôpital de Marseille. However, these results are limited to the AP-HM  
338 recruitment, which is primarily regional.

339 All six analyses of the two species revealed a dramatic change in the MALDI-TOF MS  
340 proteome composition during the lockdown, suggesting a shift in their strain composition.  
341 Regarding *H. influenzae*, this change persisted immediately after the lockdown, with a partial  
342 return in 2021 to a strain mix like the pre-lockdown situation. The frequent proximity in the

343 dendrogram of strains coming from the lockdown and immediate post-lockdown periods  
344 suggests that subsequently encountered strains may have been selected during the lockdown,  
345 with a progressive increase in subspecies diversity over time. The grouping of lockdown  
346 spectra in the year comparisons, even if they are spread across several dendrogram clusters,  
347 supports the idea that they differ from the spectra of the other periods. Conversely, regardless  
348 of sample types, *S. aureus* displayed a change in spectral composition during the lockdown,  
349 but without a continuation during the immediate post-lockdown period. Similarities in spectra  
350 profiles with the lockdown period emerged later during the 2021 period, confirmed by  
351 statistically significant closer proximity of these spectra. While 21 out of 40 most  
352 discriminant peaks were shared by the two discriminant analyses of the respiratory and blood  
353 samples, indicating a resemblance of distinctive protein profile immediately around the  
354 lockdown period with the samples one year later, only 14 out of 40 most discriminant peaks  
355 were shared by the skin samples, showing a looser likeliness of spectral profiles one year  
356 later.

357         Interpreting the results requires consideration that the apparent population diversity  
358 conveyed by MALDI-TOF spectra reflects the species' strain diversity, which is a trade-off  
359 between within-host diversities, mutations, inoculum strain heterogeneity, inoculum  
360 frequency, environmental selection, and transmission bottleneck. Previous simulation studies  
361 showed that small bottlenecks rapidly result in a single dominant strain carried and  
362 transmitted in the infected population 5. Our results indicated a decrease in strain diversity for  
363 both studied bacteria. An hypothesis is that the lockdown and preventive measures could have  
364 been associated with a reduction in inoculum frequency and an increase in the bottleneck  
365 effect due to reduced social interaction, and could have contributed to a reduction in genetic  
366 diversity within the bacterial population. Additionally, strict hygiene measures, such as  
367 frequent handwashing, use of disinfectants, and wearing masks, all distancing measures used



368 during the end of 2020, were reported to reduce bacteria diversity 22. Household transmission  
369 could have become the primary mode of transmission, at the expense of community  
370 transmission.

371 *H. influenzae* is an obligate commensal of the human respiratory tract and non-typeable  
372 *H. influenzae* (NTHi) are currently the predominant strains 23. NTHi strains are more diverse  
373 and influenced by recombination compared to encapsulated *H. influenzae* 24. These genetic  
374 mechanisms, altering the gene expression or content, generate strains with fitness  
375 characteristics aimed at surviving under various selective pressure within a same kind of host  
376 25. In particular, NTHi are able to switch between genetic variants at high frequency (phase  
377 variation mechanism) 26. This capability of dynamic recombination could explain why the  
378 change in *H. influenzae* strains' diversity was only transitory for *H. influenzae*.

379 On the contrary, *S. aureus* is found in warm-blood animals and in the environment,  
380 constituting an important reservoir 20. It shows a slow but detectable genetic evolution of its  
381 population, at a rate of 2.72 mutations per megabase per year 19, in association with a fast  
382 replication rate 27. Twenty to twenty-five percent of the human population present a  
383 persistent carriage of *S. aureus* 28, which is rarely polyclonal (about 6.6 %) 29, mainly  
384 influenced by household transmission 20, possibly potentialized by host genetic factors 30.  
385 Epidemiologically isolated populations have shown very low diversity of their carriage 30.  
386 The rapid return to the pre-lockdown spectral configuration, followed by a progression toward  
387 the lockdown situation one year later, may be explained by a first influence of the reservoir  
388 multiplicity, followed by a return to the predominance of household transmissions, strengthen  
389 by the post-lockdown preventive measures.

390 This study showed that, for our human population and the studied bacteria species,  
391 lockdown was associated with a dramatic change of species compositions, but with different  
392 further evolution. We observed a transitory persistence of the strain composition that occurred

393 during the lockdown for a human-dependant bacteria species, with a high frequency of  
394 genetic variant. Conversely, we observed a long-term evolution toward a return to the  
395 lockdown composition for a bacterial species with multiple reservoirs, a slow mutation rate,  
396 and an important household-dependant transmission.

397

398

## 399 **References**

- 400 1 Rotulo GA, Percivale B, Molteni M, et al. The impact of COVID-19 lockdown on  
401 infectious diseases epidemiology: The experience of a tertiary Italian Pediatric  
402 Emergency Department. *The Am J Emerg Med.* 2021;43:115–7.
- 403 2 Vierucci F, Bacci C, Mucaria C, Dini F, Federico G, Maielli M, Vaccaro A. How  
404 COVID-19 Pandemic Changed Children and Adolescents Use of the Emergency  
405 Department: the Experience of a Secondary Care Pediatric Unit in Central Italy. *SN*  
406 *Comprehensive Clinical Medicine.* 2020;2:1959–1969.
- 407 3 Brueggemann AB, Jansen van Rensburg MJ, Shaw D, McCarthy ND. Changes in the  
408 incidence of invasive disease due to *Streptococcus pneumoniae*, *Haemophilus*  
409 *influenzae*, and *Neisseria meningitidis* during the COVID-19 pandemic in 26 countries  
410 and territories in the Invasive Respiratory Infection Surveillance Initiative: a  
411 prospective analysis of surveillance data. *Lancet Digit Health.* 2021 Jun;3(6):e360-  
412 e370.
- 413 4 Kaba L, Giraud-Gatineau A, Jimeno MT, Rolain JM, Colson P, Raoult D, et al.  
414 Consequences of the COVID-19 Outbreak Lockdown on Non-Viral Infectious Agents  
415 as Reported by a Laboratory-Based Surveillance System at the IHU Méditerranée  
416 Infection, Marseille, France. *Journal of Clinical Medicine.* 21 juill 2021;10(15):3210.
- 417 5 Worby CJ, Lipsitch M, Hanage WP. Within-host bacterial diversity hinders accurate  
418 reconstruction of transmission networks from genomic distance data. *PLoS Comput*  
419 *Biol.* 2014 Mar 27;10(3):e1003549. doi: 10.1371/journal.pcbi.1003549. PMID:  
420 24675511; PMCID: PMC3967931.
- 421 6 Seng P, Rolain JM, Fournier PE, La Scola B, Drancourt M, Raoult D. MALDI-TOF-  
422 mass spectrometry applications in clinical microbiology. *Future Microbiology.* nov  
423 2010;5(11):1733-54.

- 424 7 Freiwald A, Sauer S. Phylogenetic classification and identification of bacteria by mass  
425 spectrometry. *Nat Protoc.* mai 2009;4(5):732-42.
- 426 8 Månsson V, Resman F, Kostrzewa M, Nilson B, Riesbeck K. Identification of  
427 *Haemophilus influenzae* Type b Isolates by Use of Matrix-Assisted Laser Desorption  
428 Ionization–Time of Flight Mass Spectrometry. McAdam AJ, éditeur. *J Clin Microbiol.*  
429 juill 2015;53(7):2215-24.
- 430 9 Josten M, Reif M, Szekat C, Al-Sabti N, Roemer T, Sparbier K, et al. Analysis of the  
431 Matrix-Assisted Laser Desorption Ionization–Time of Flight Mass Spectrum of  
432 *Staphylococcus aureus* Identifies Mutations That Allow Differentiation of the Main  
433 Clonal Lineages. *J Clin Microbiol.* juin 2013;51(6):1809-17.
- 434 10 Ueda O, Tanaka S, Nagasawa Z, Hanaki H, Shobuike T, Miyamoto H. Development  
435 of a novel matrix-assisted laser desorption/ionization time-of-flight mass spectrum  
436 (MALDI-TOF-MS)-based typing method to identify meticillin-resistant  
437 *Staphylococcus aureus* clones. *Journal of Hospital Infection.* juin 2015;90(2):147-55.
- 438 11 Sauget M, van der Mee-Marquet N, Bertrand X, Hocquet D. Matrix-assisted laser  
439 desorption ionization-time of flight Mass spectrometry can detect *Staphylococcus*  
440 *aureus* clonal complex 398. *Journal of Microbiological Methods.* août 2016;127:20-3.
- 441 12 Giraud-Gatineau A, Texier G, Garnotel E, Raoult D, Chaudet H. Insights Into  
442 Subspecies Discrimination Potentiality From Bacteria MALDI-TOF Mass Spectra by  
443 Using Data Mining and Diversity Studies. *Frontiers in Microbiology* [Internet]. 13  
444 août 2020 [cité 23 juin 2022];11. Disponible sur:  
445 <https://www.frontiersin.org/article/10.3389/fmicb.2020.01931/full>
- 446 13 Giraud-Gatineau A, Texier G, Fournier PE, Raoult D, Chaudet H. Using MALDI-TOF  
447 spectra in epidemiological surveillance for the detection of bacterial subgroups with a  
448 possible epidemic potential. *BMC Infect Dis.* déc 2021;21(1):1109.

- 449 14 Gibb S, Strimmer K. MALDIquant: a versatile R package for the analysis of mass  
450 spectrometry data. *Bioinformatics*. 1 sept 2012;28(17):2270-1.
- 451 15 Rousseeuw P.J. Silhouettes: a graphical aid to the interpretation and validation of  
452 cluster analysis. *Computational and Applied Mathematics* 1987; 20: 53–65
- 453 16 Wald and J. Wolfowitz, "On a test whether two samples are from the same  
454 population" (*Annals of Math. Stat.*, Vol. XI, No. 2, June (1940) pp. 147
- 455 17 Barnard GA (1945). A new test for  $2 \times 2$  tables. *Nature* 156:177
- 456 18 Gibb S, Strimmer K. Differential protein expression and peak selection in mass  
457 spectrometry data by binary discriminant analysis. *Bioinformatics*. 1 oct  
458 2015;31(19):3156-62.
- 459 19 Young BC, Golubchik T, Batty EM, Fung R, Larner-Svensson H, Votintseva AA,  
460 Miller RR, Godwin H, Knox K, Everitt RG, Iqbal Z, Rimmer AJ, Cule M, Ip CL,  
461 Didelot X, Harding RM, Donnelly P, Peto TE, Crook DW, Bowden R, Wilson DJ.  
462 Evolutionary dynamics of *Staphylococcus aureus* during progression from carriage to  
463 disease. *Proc Natl Acad Sci U S A*. 2012 Mar 20;109(12):4550-5.
- 464 20 Knox J, Uhlemann AC, Lowy FD. *Staphylococcus aureus* infections: transmission  
465 within households and the community. *Trends in Microbiology*. juill  
466 2015;23(7):437-44.
- 467 21 Seng P, Abat C, Rolain JM, Colson P, Lagier JC, Gouriet F, Fournier PE, Drancourt  
468 M, La Scola B, Raoult D. Identification of rare pathogenic bacteria in a clinical  
469 microbiology laboratory: impact of matrix-assisted laser desorption ionization-time of  
470 flight mass spectrometry. *J Clin Microbiol*. 2013 Jul;51(7):2182-94.
- 471 22 Finlay BB, Amato KR, Azad M, Blaser MJ, Bosch TCG, Chu H, Dominguez-Bello  
472 MG, Ehrlich SD, Elinav E, Geva-Zatorsky N, Gros P, Guillemin K, Keck F, Korem T,  
473 McFall-Ngai MJ, Melby MK, Nichter M, Pettersson S, Poinar H, Rees T, Tropini C,

- 474 Zhao L, Giles-Vernick T. The hygiene hypothesis, the COVID pandemic, and  
475 consequences for the human microbiome. *Proc Natl Acad Sci U S A*. 2021 Feb  
476 9;118(6):e2010217118. doi: 10.1073/pnas.2010217118. Erratum in: *Proc Natl Acad*  
477 *Sci U S A*. 2021 Mar 16;118(11): PMID: 33472859; PMCID: PMC8017729.
- 478 23 De Chiara M, Hood D, Muzzi A, Pickard DJ, Perkins T, Pizza M, Dougan G,  
479 Rappuoli R, Moxon ER, Soriani M, Donati C. Genome sequencing of disease and  
480 carriage isolates of nontypeable *Haemophilus influenzae* identifies discrete population  
481 structure. *Proc Natl Acad Sci U S A*. 2014 Apr 8;111(14):5439-44.
- 482 24 Meats E, Feil EJ, Stringer S, Cody AJ, Goldstein R, Kroll JS, Popovic T, Spratt BG.  
483 Characterization of encapsulated and noncapsulated *Haemophilus influenzae* and  
484 determination of phylogenetic relationships by multilocus sequence typing. *J Clin*  
485 *Microbiol*. 2003 Apr;41(4):1623-36.
- 486 25 Gilsdorf JR, Marrs CF, Foxman B. *Haemophilus influenzae*: genetic variability and  
487 natural selection to identify virulence factors. *Infect Immun*. 2004 May;72(5):2457-61.
- 488 26 Bayliss CD, Sweetman WA, Moxon ER. Mutations in *Haemophilus influenzae*  
489 mismatch repair genes increase mutation rates of dinucleotide repeat tracts but not  
490 dinucleotide repeat-driven pilin phase variation rates. *J Bacteriol*. 2004  
491 May;186(10):2928-35.
- 492 27 Szafrńska AK, Junker V, Steglich M, Nübel U. Rapid cell division of *Staphylococcus*  
493 *aureus* during colonization of the human nose. *BMC Genomics*. 2019 Mar  
494 20;20(1):229.
- 495 28 Sollid JU, Furberg AS, Hanssen AM, Johannessen M. *Staphylococcus aureus*:  
496 determinants of human carriage. *Infect Genet Evol*. 2014 Jan;21:531-41.

- 497 29 Cespedes C, Said-Salim B, Miller M, Lo SH, Kreiswirth BN, Gordon RJ, Vavagiakis  
498 P, Klein RS, Lowy FD. The clonality of Staphylococcus aureus nasal carriage. J Infect  
499 Dis. 2005 Feb 1;191(3):444-52.
- 500 30 Ruimy R, Angebault C, Djossou F, Dupont C, Epelboin L, Jarraud S, Lefevre LA, Bes  
501 M, Lixandru BE, Bertine M, El Miniai A, Renard M, Bettinger RM, Lescat M,  
502 Clermont O, Peroz G, Lina G, Tavakol M, Vandenesch F, van Belkum A, Rousset F,  
503 Andremont A. Are host genetics the predominant determinant of persistent nasal  
504 Staphylococcus aureus carriage in humans? J Infect Dis. 2010 Sep 15;202(6):924-34.  
505

medRxiv preprint doi: <https://doi.org/10.1101/2024.05.08.24307047>; this version posted May 9, 2024. The copyright holder for this preprint (which was not certified by peer review) is the author/funder, who has granted medRxiv a license to display the preprint in perpetuity. It is made available under a [CC-BY 4.0 International license](https://creativecommons.org/licenses/by/4.0/).

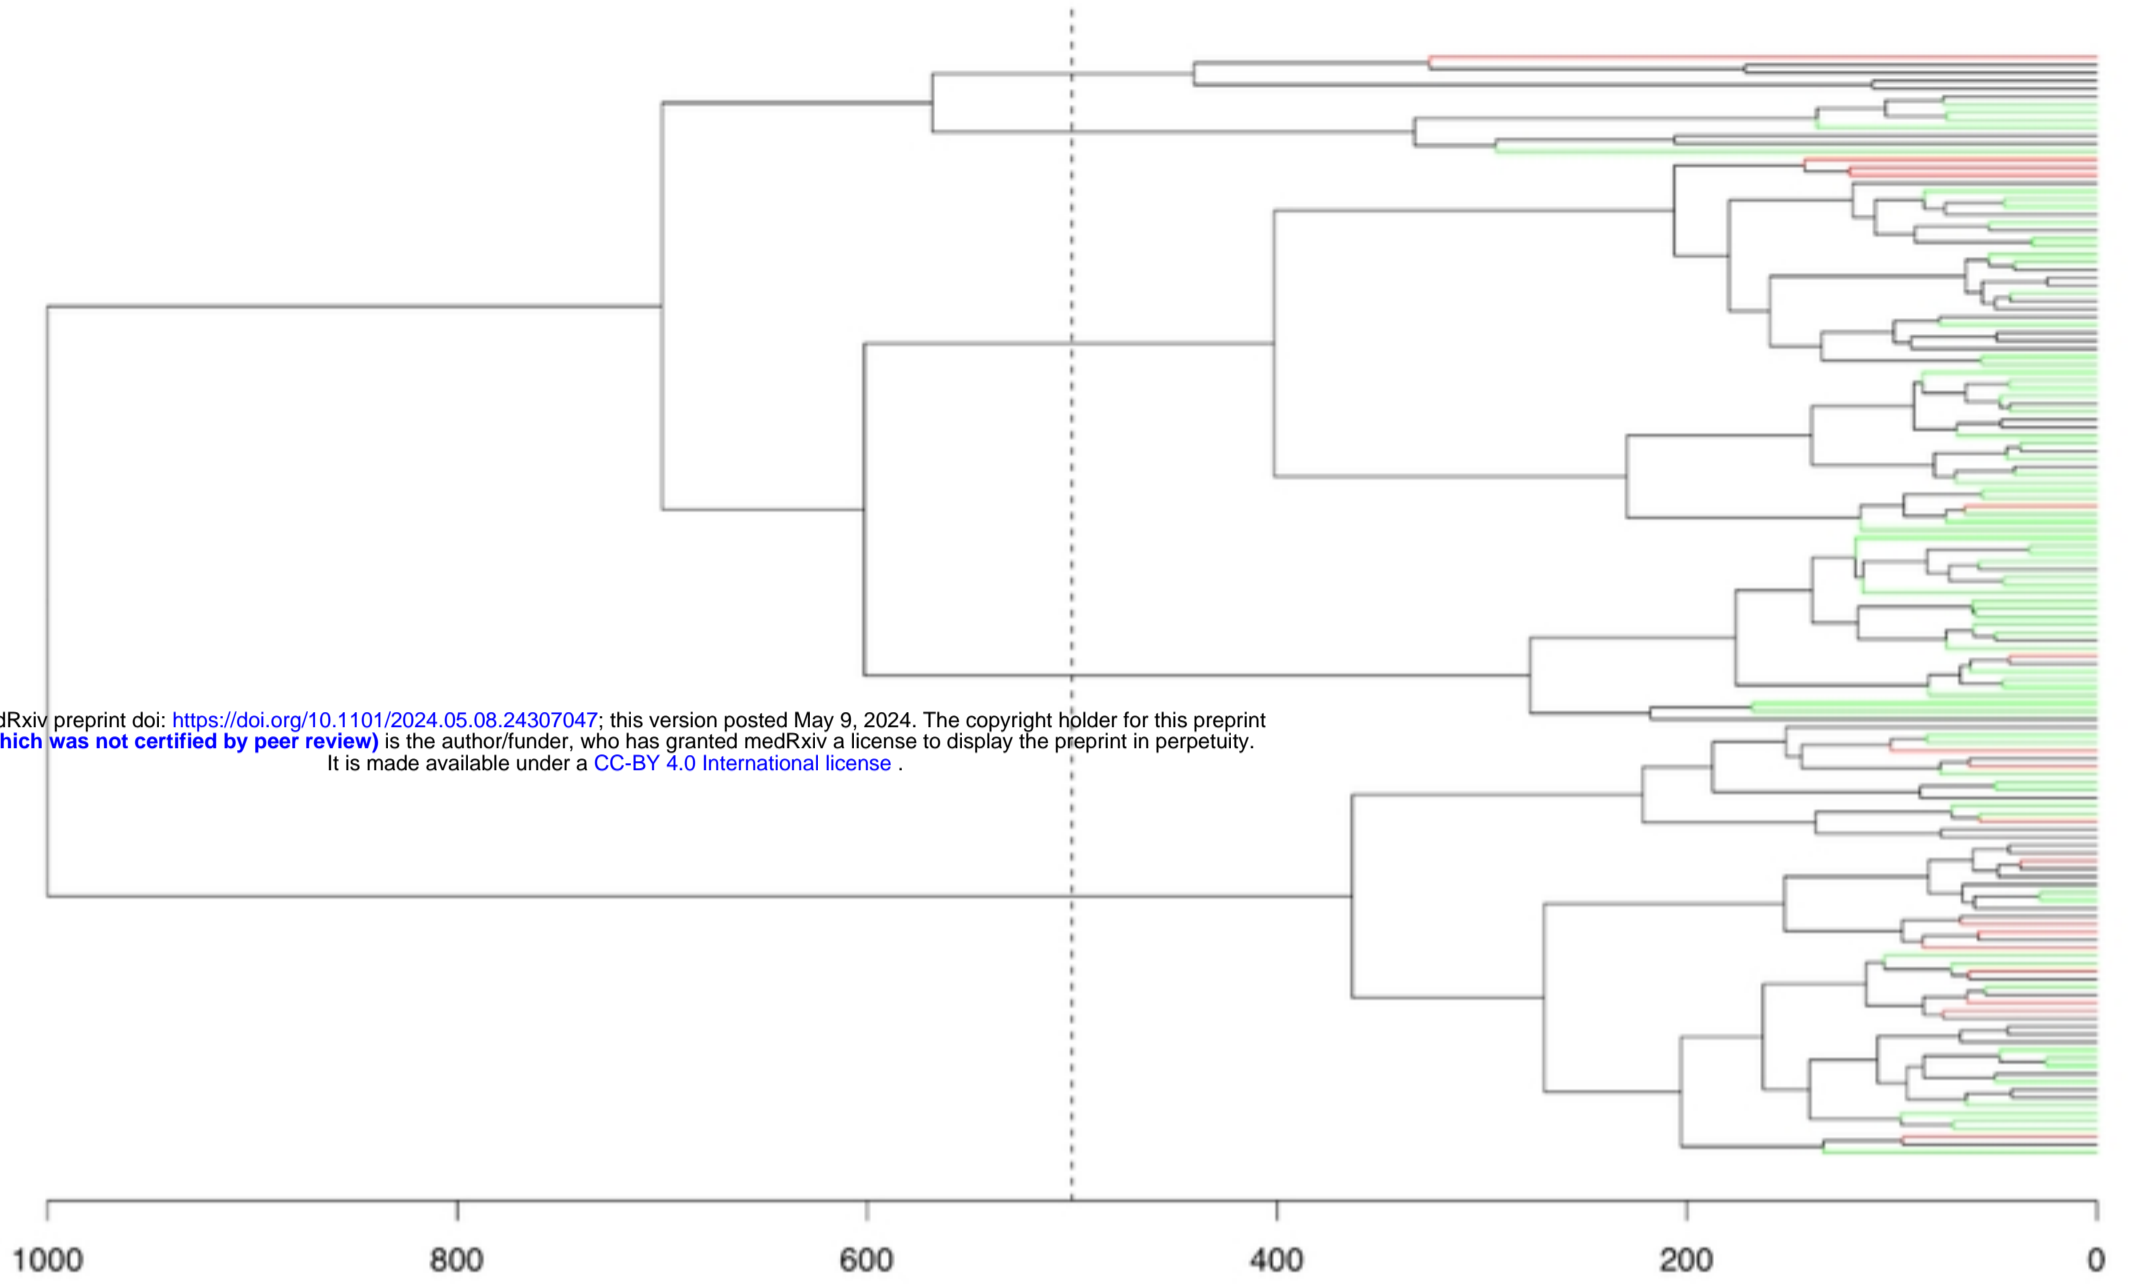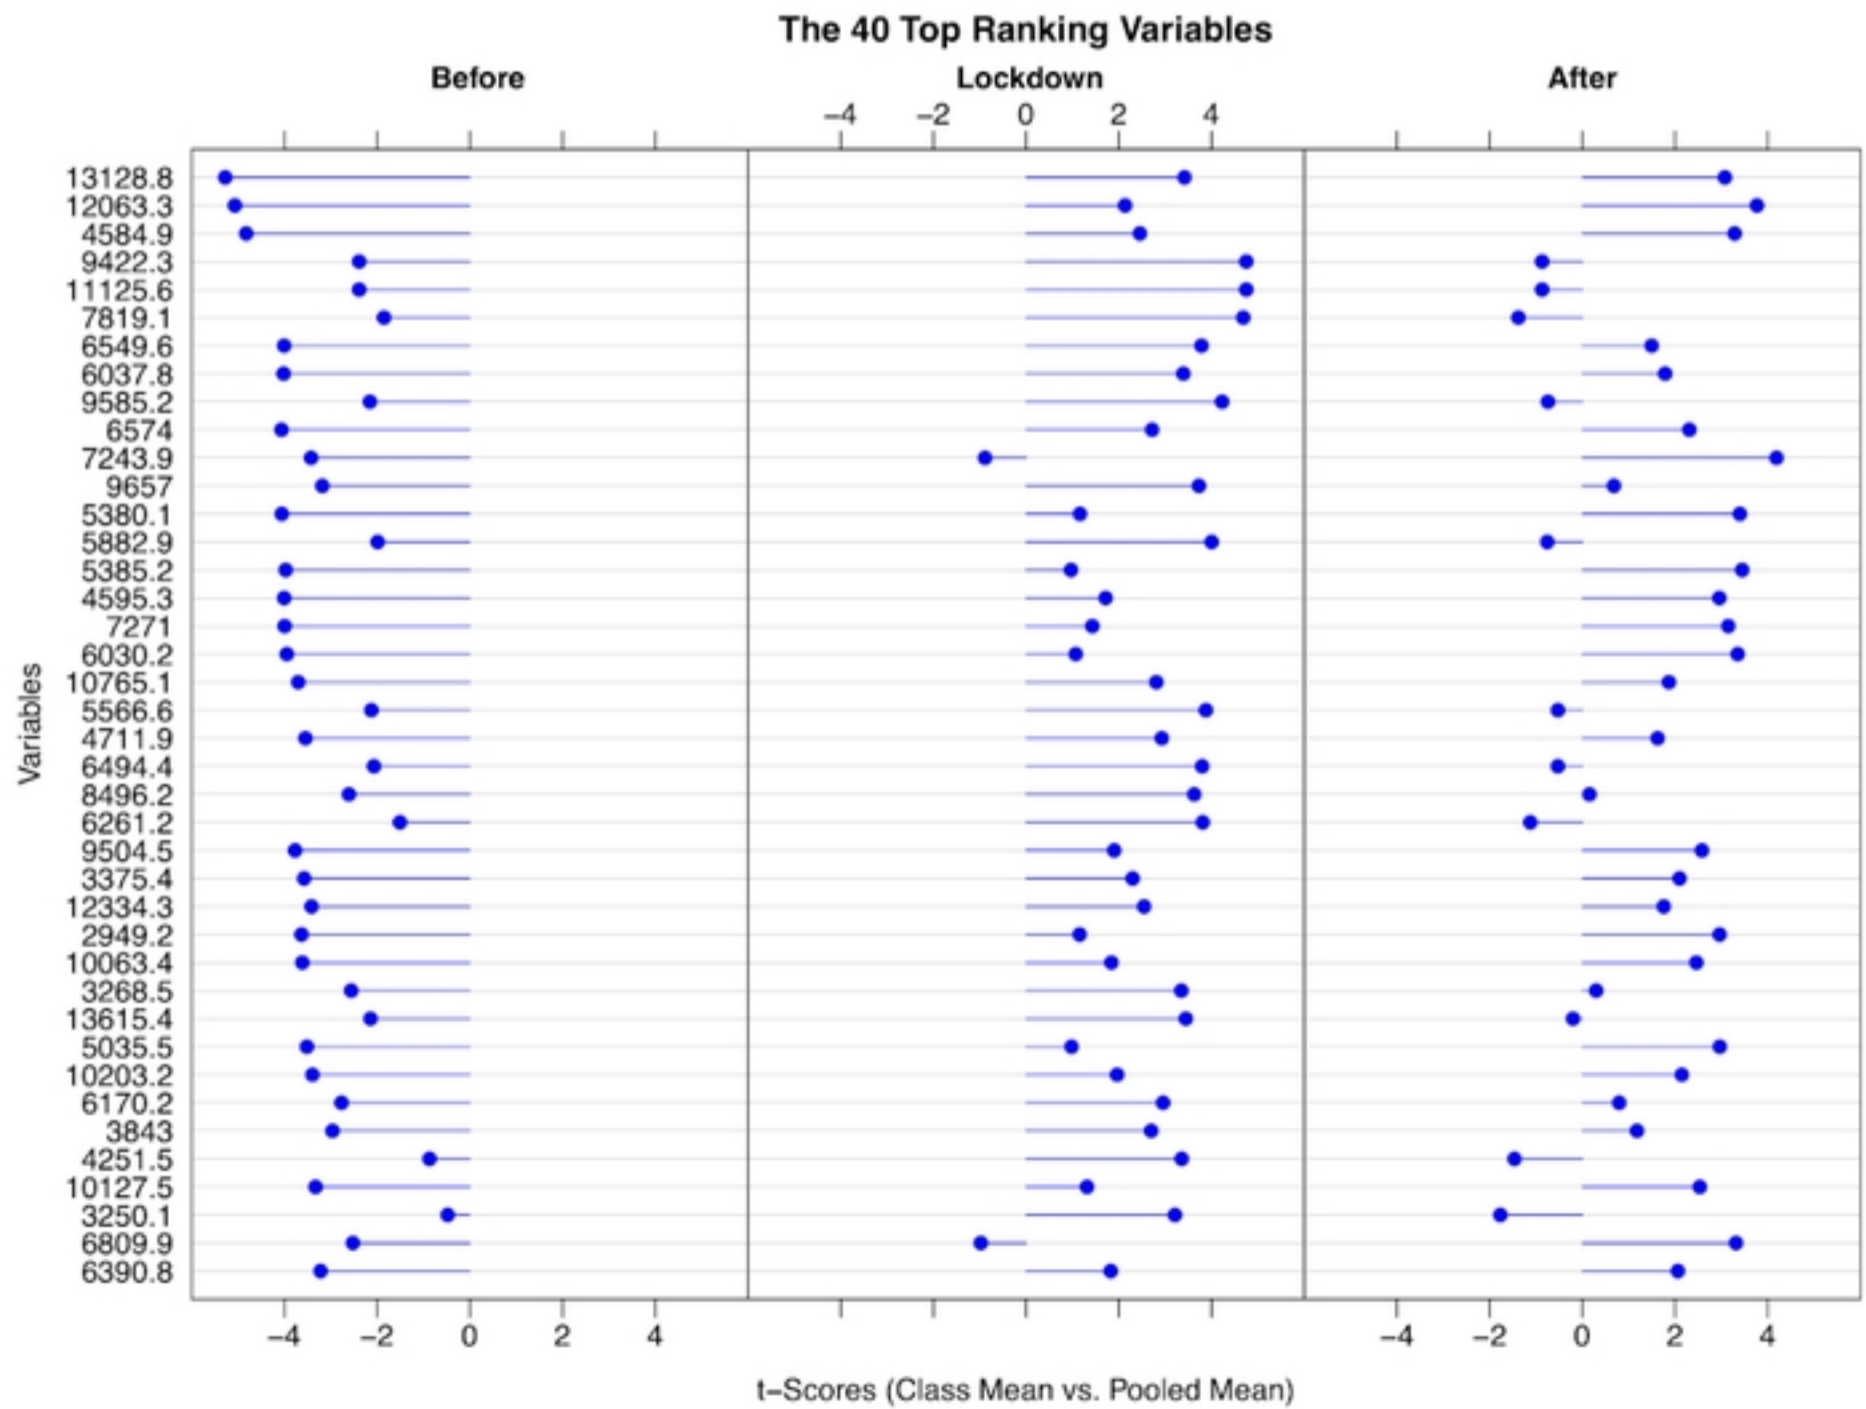

Figure1



medRxiv preprint doi: <https://doi.org/10.1101/2024.05.08.24307047>; this version posted May 9, 2024. The copyright holder for this preprint (which was not certified by peer review) is the author/funder, who has granted medRxiv a license to display the preprint in perpetuity. It is made available under a [CC-BY 4.0 International license](https://creativecommons.org/licenses/by/4.0/).

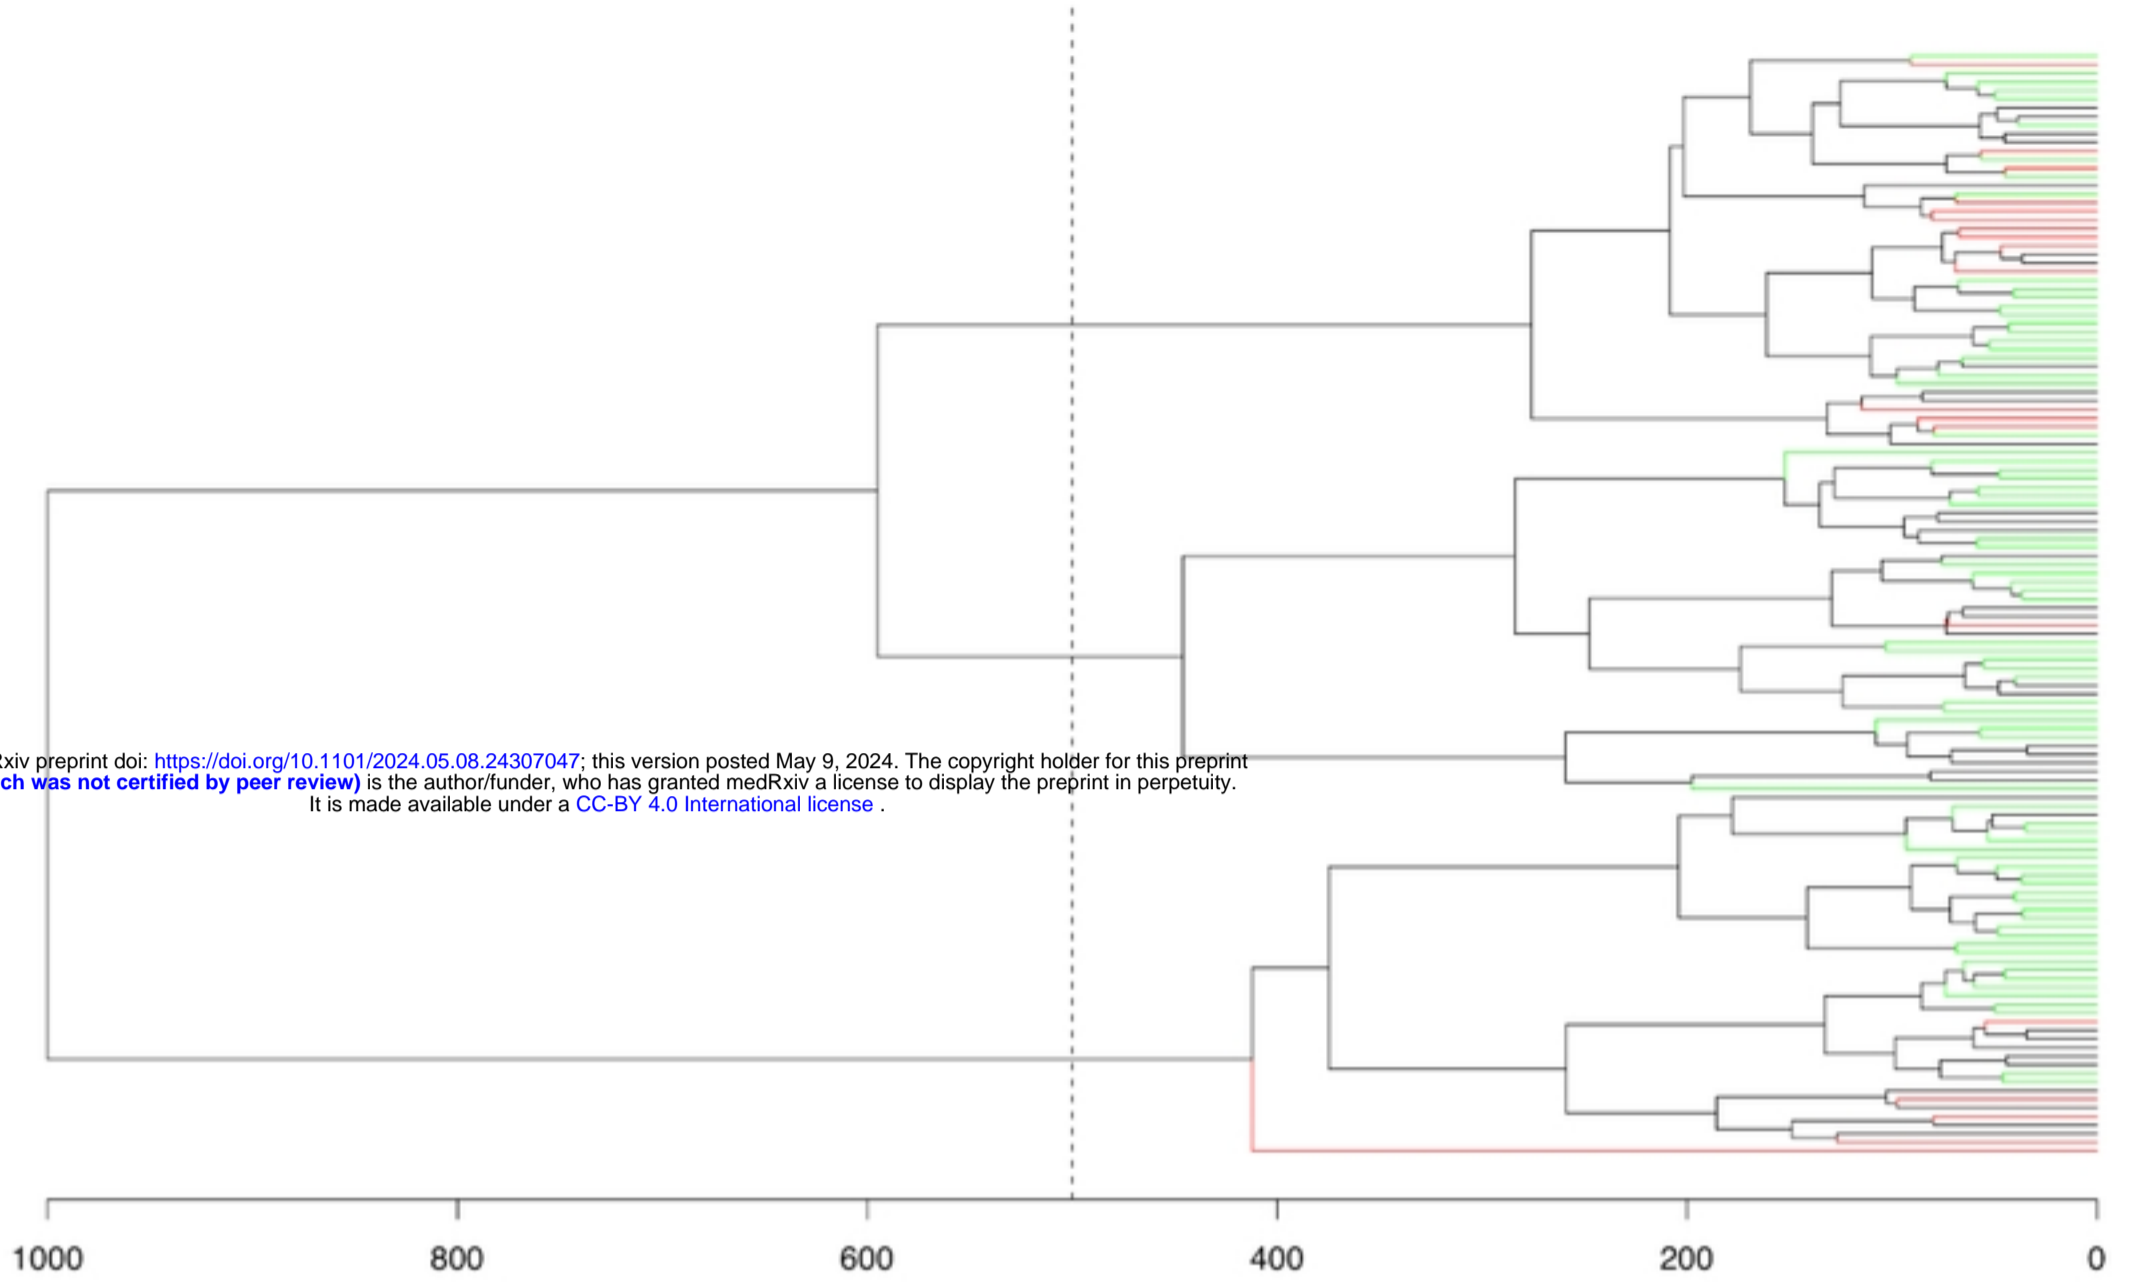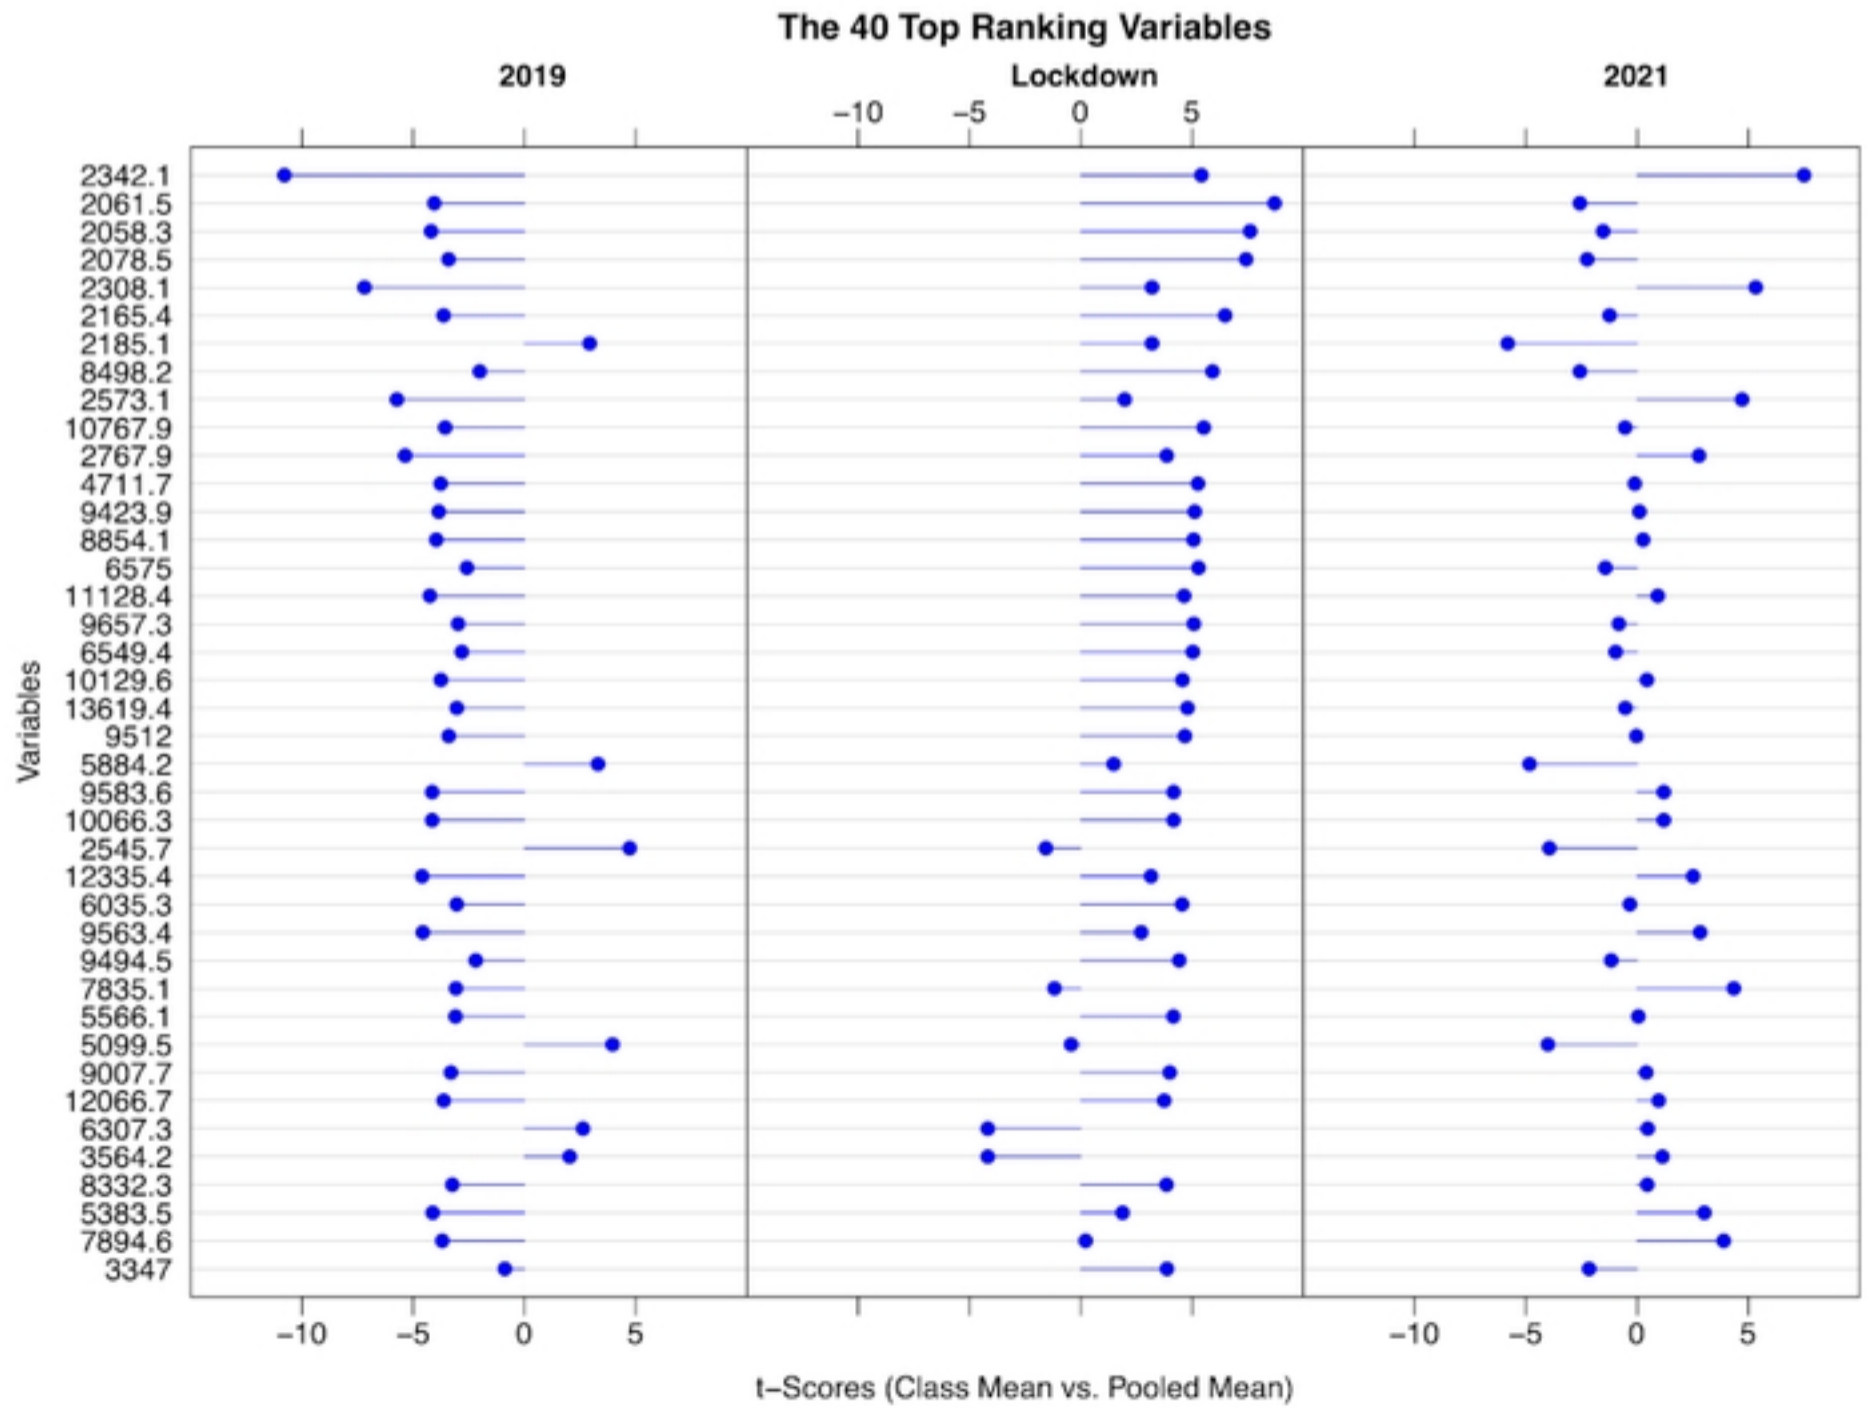

Figure2

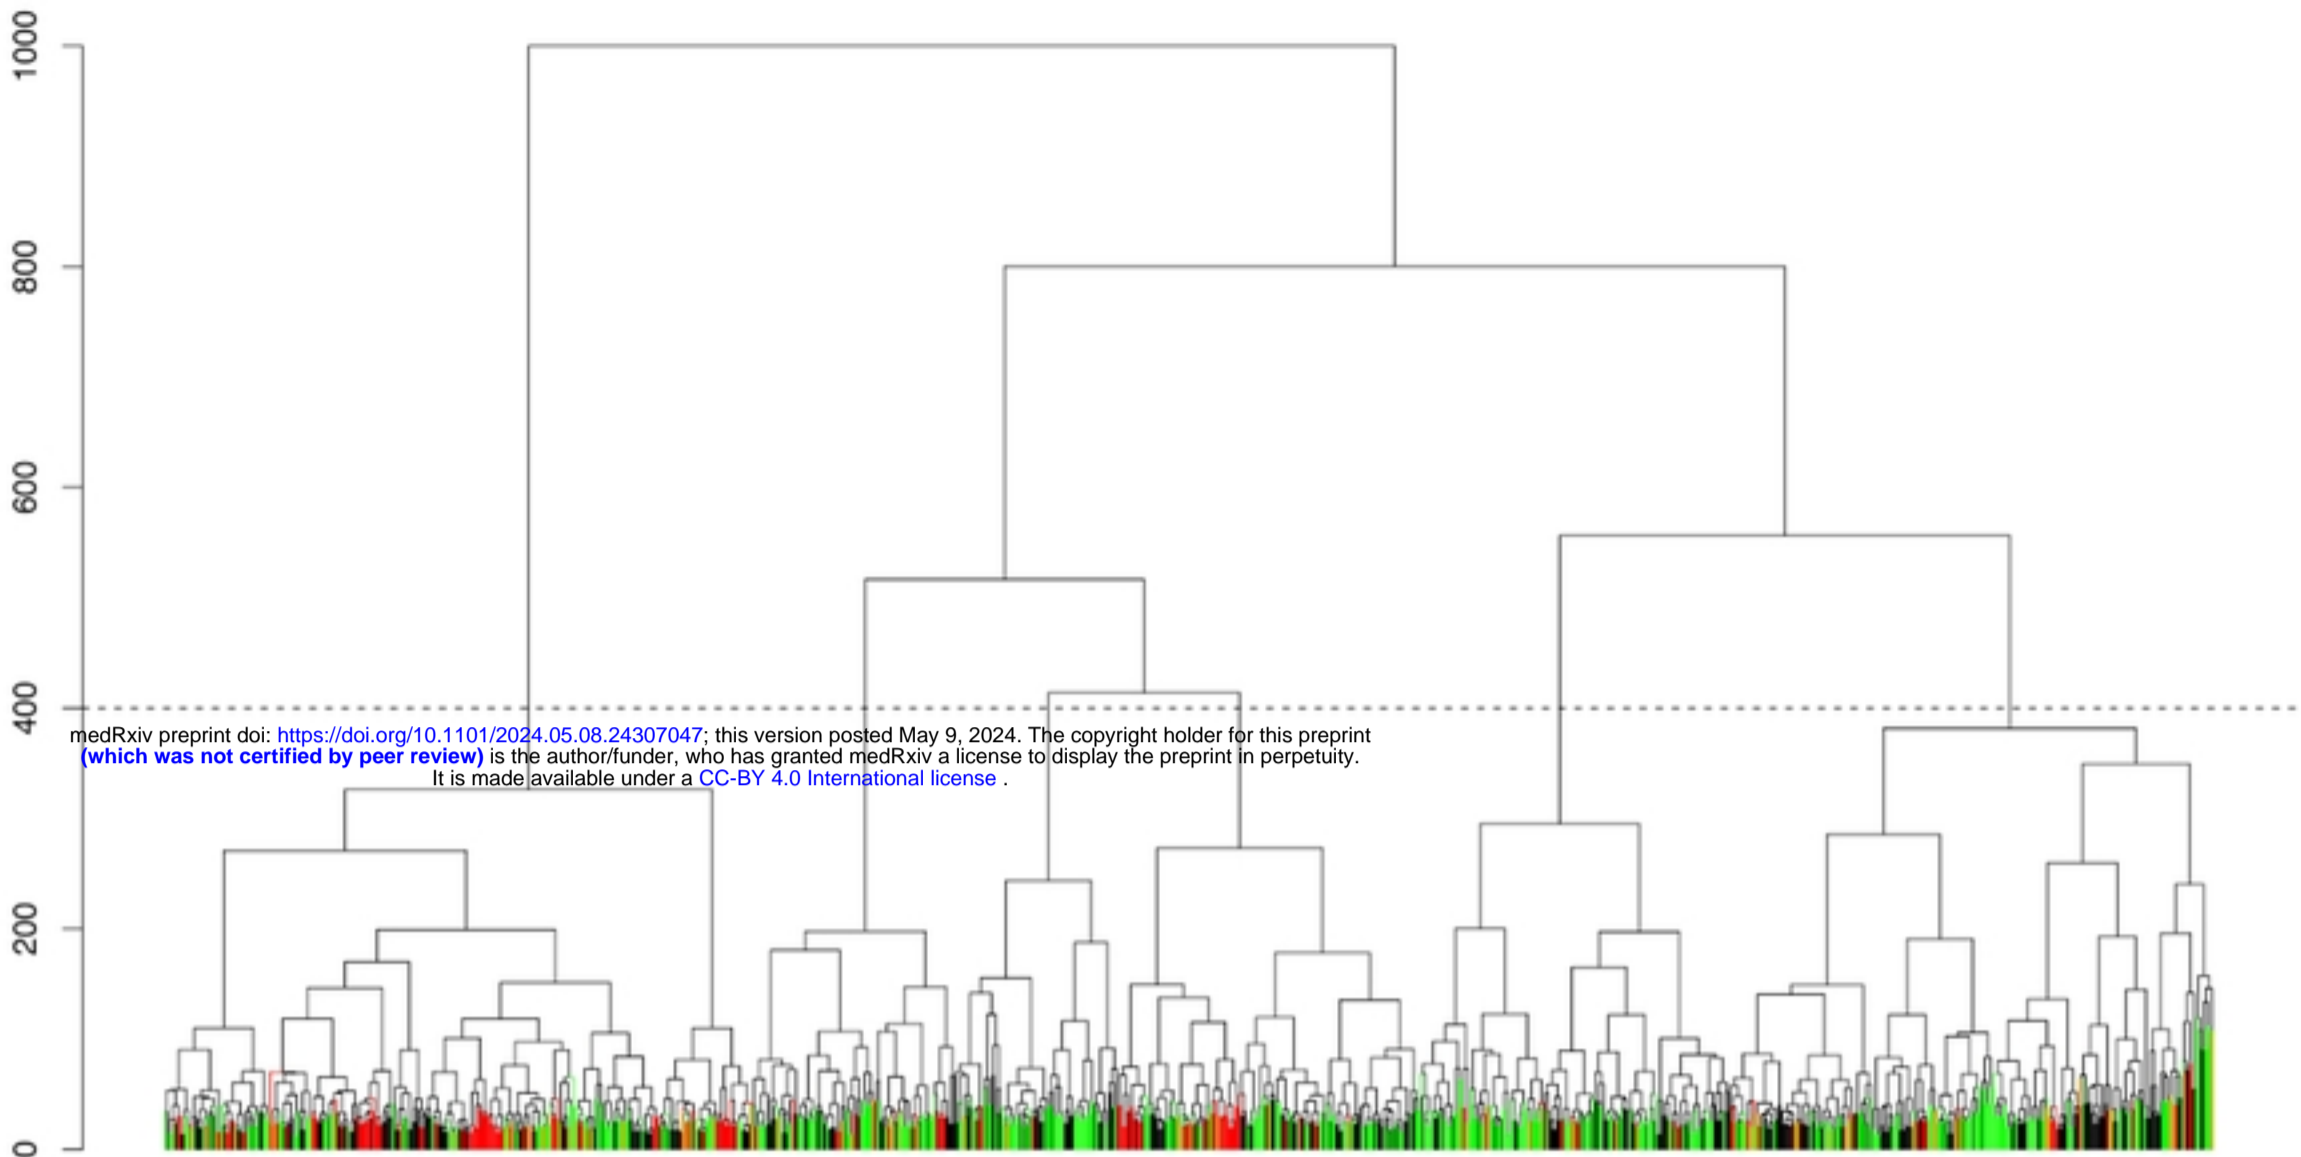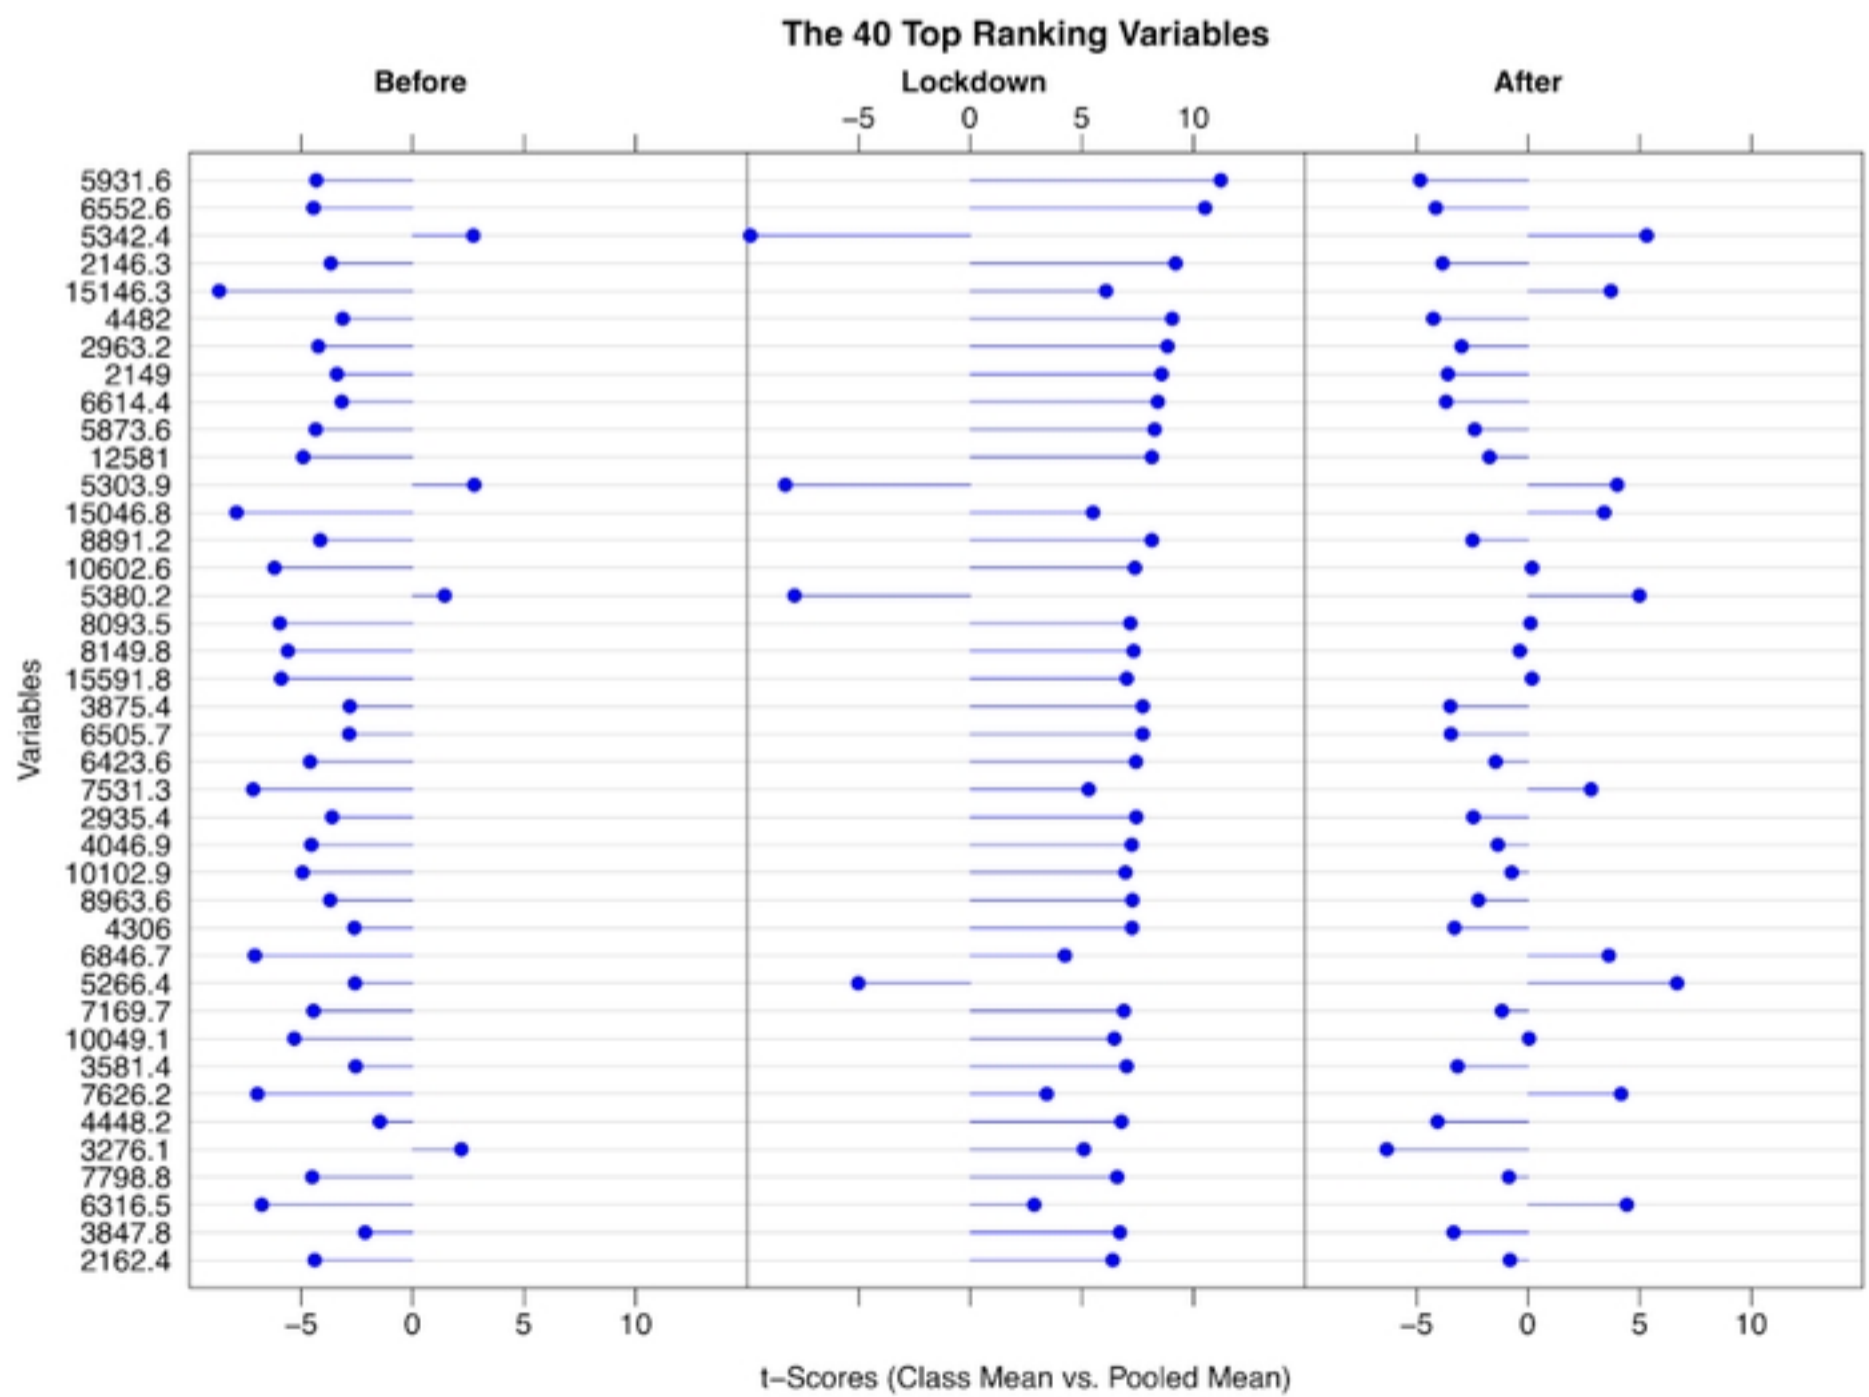

Figure3

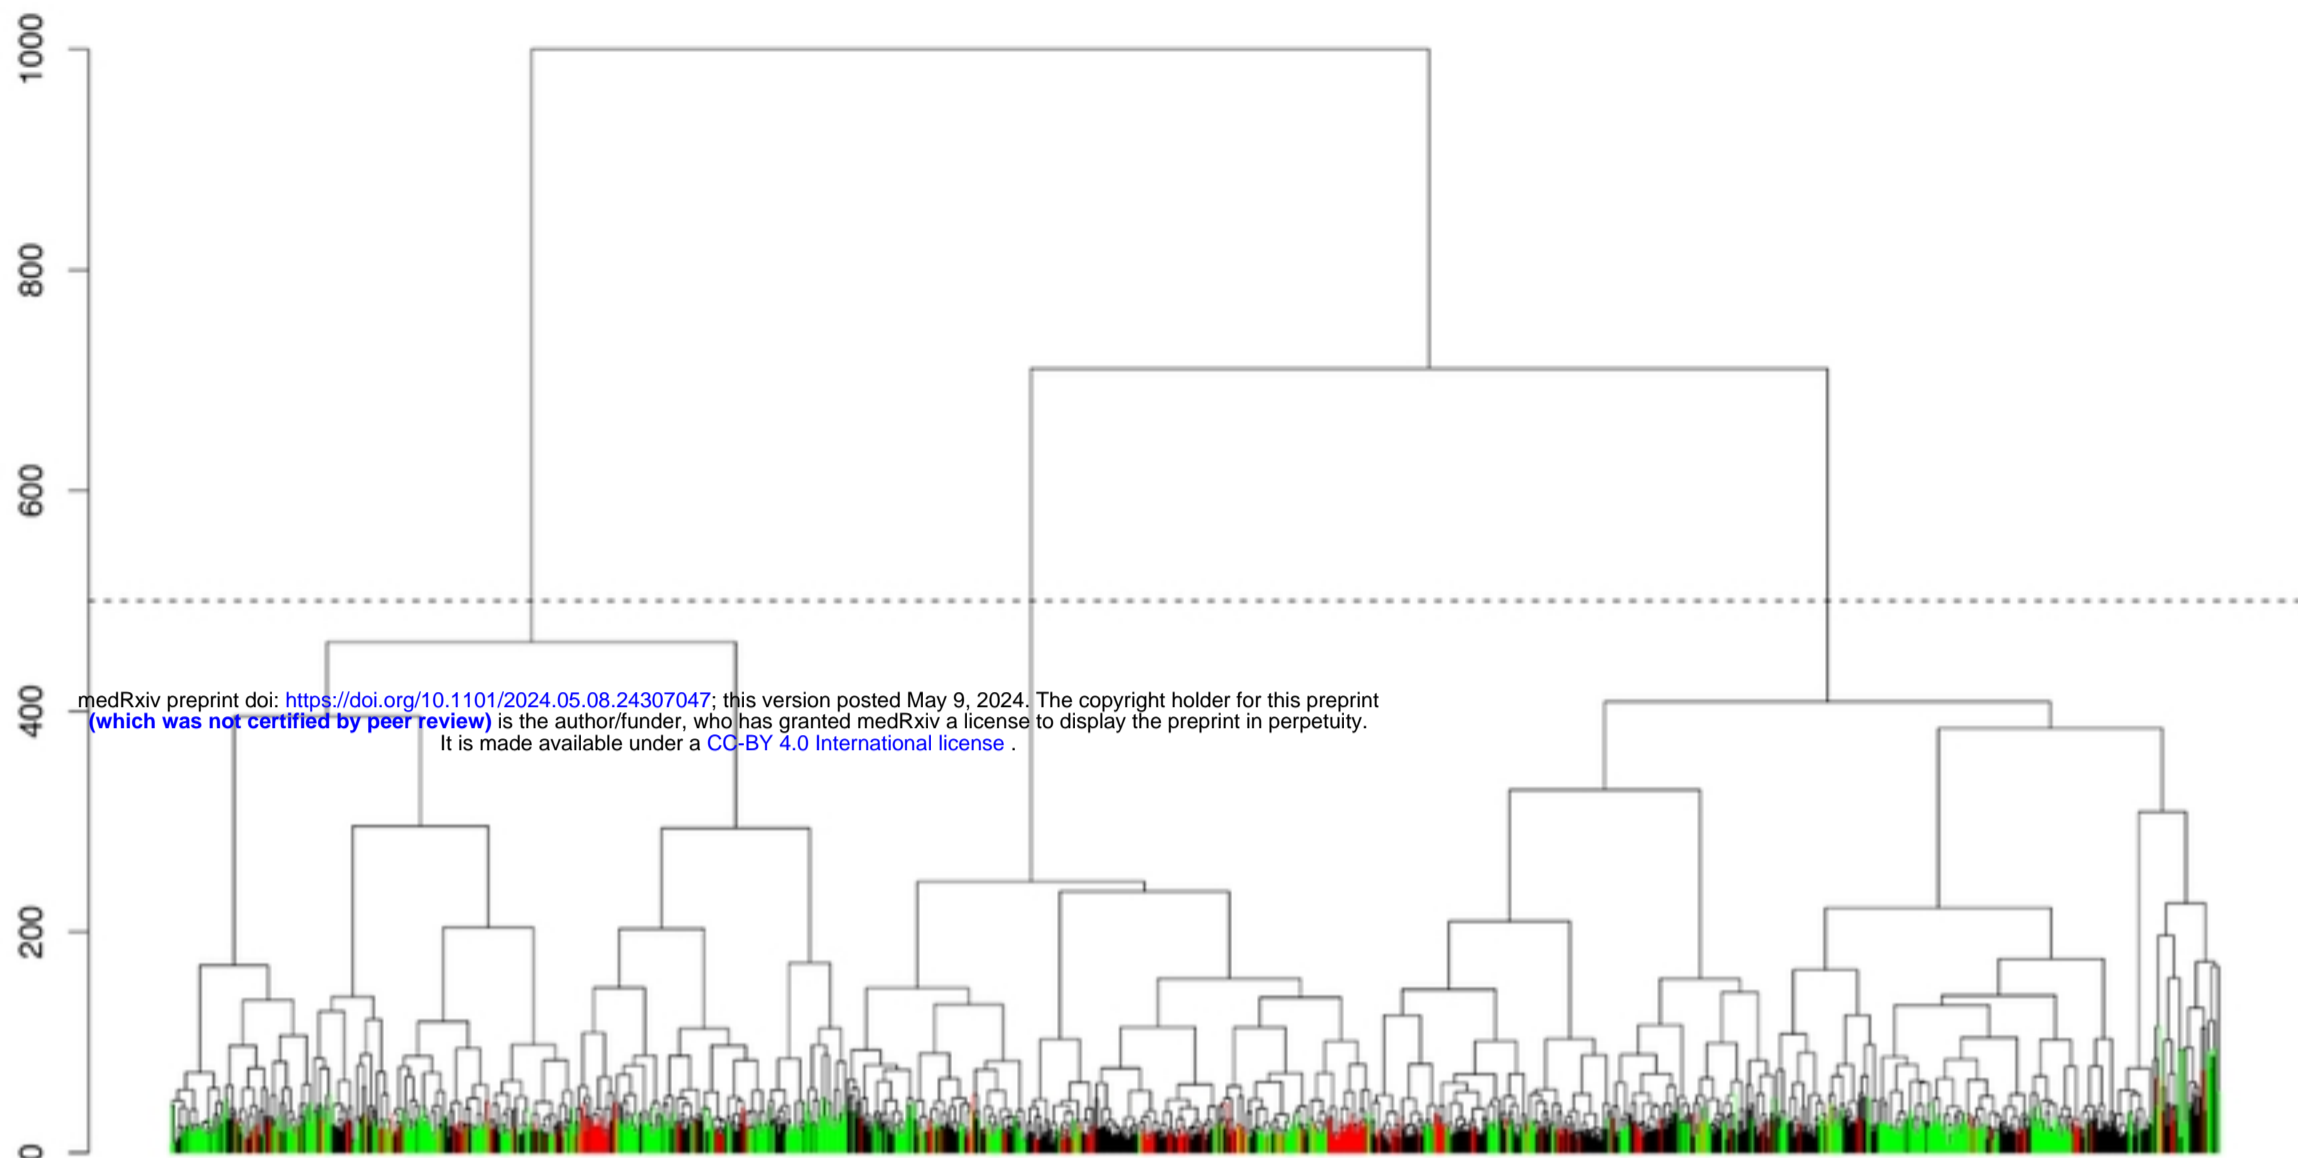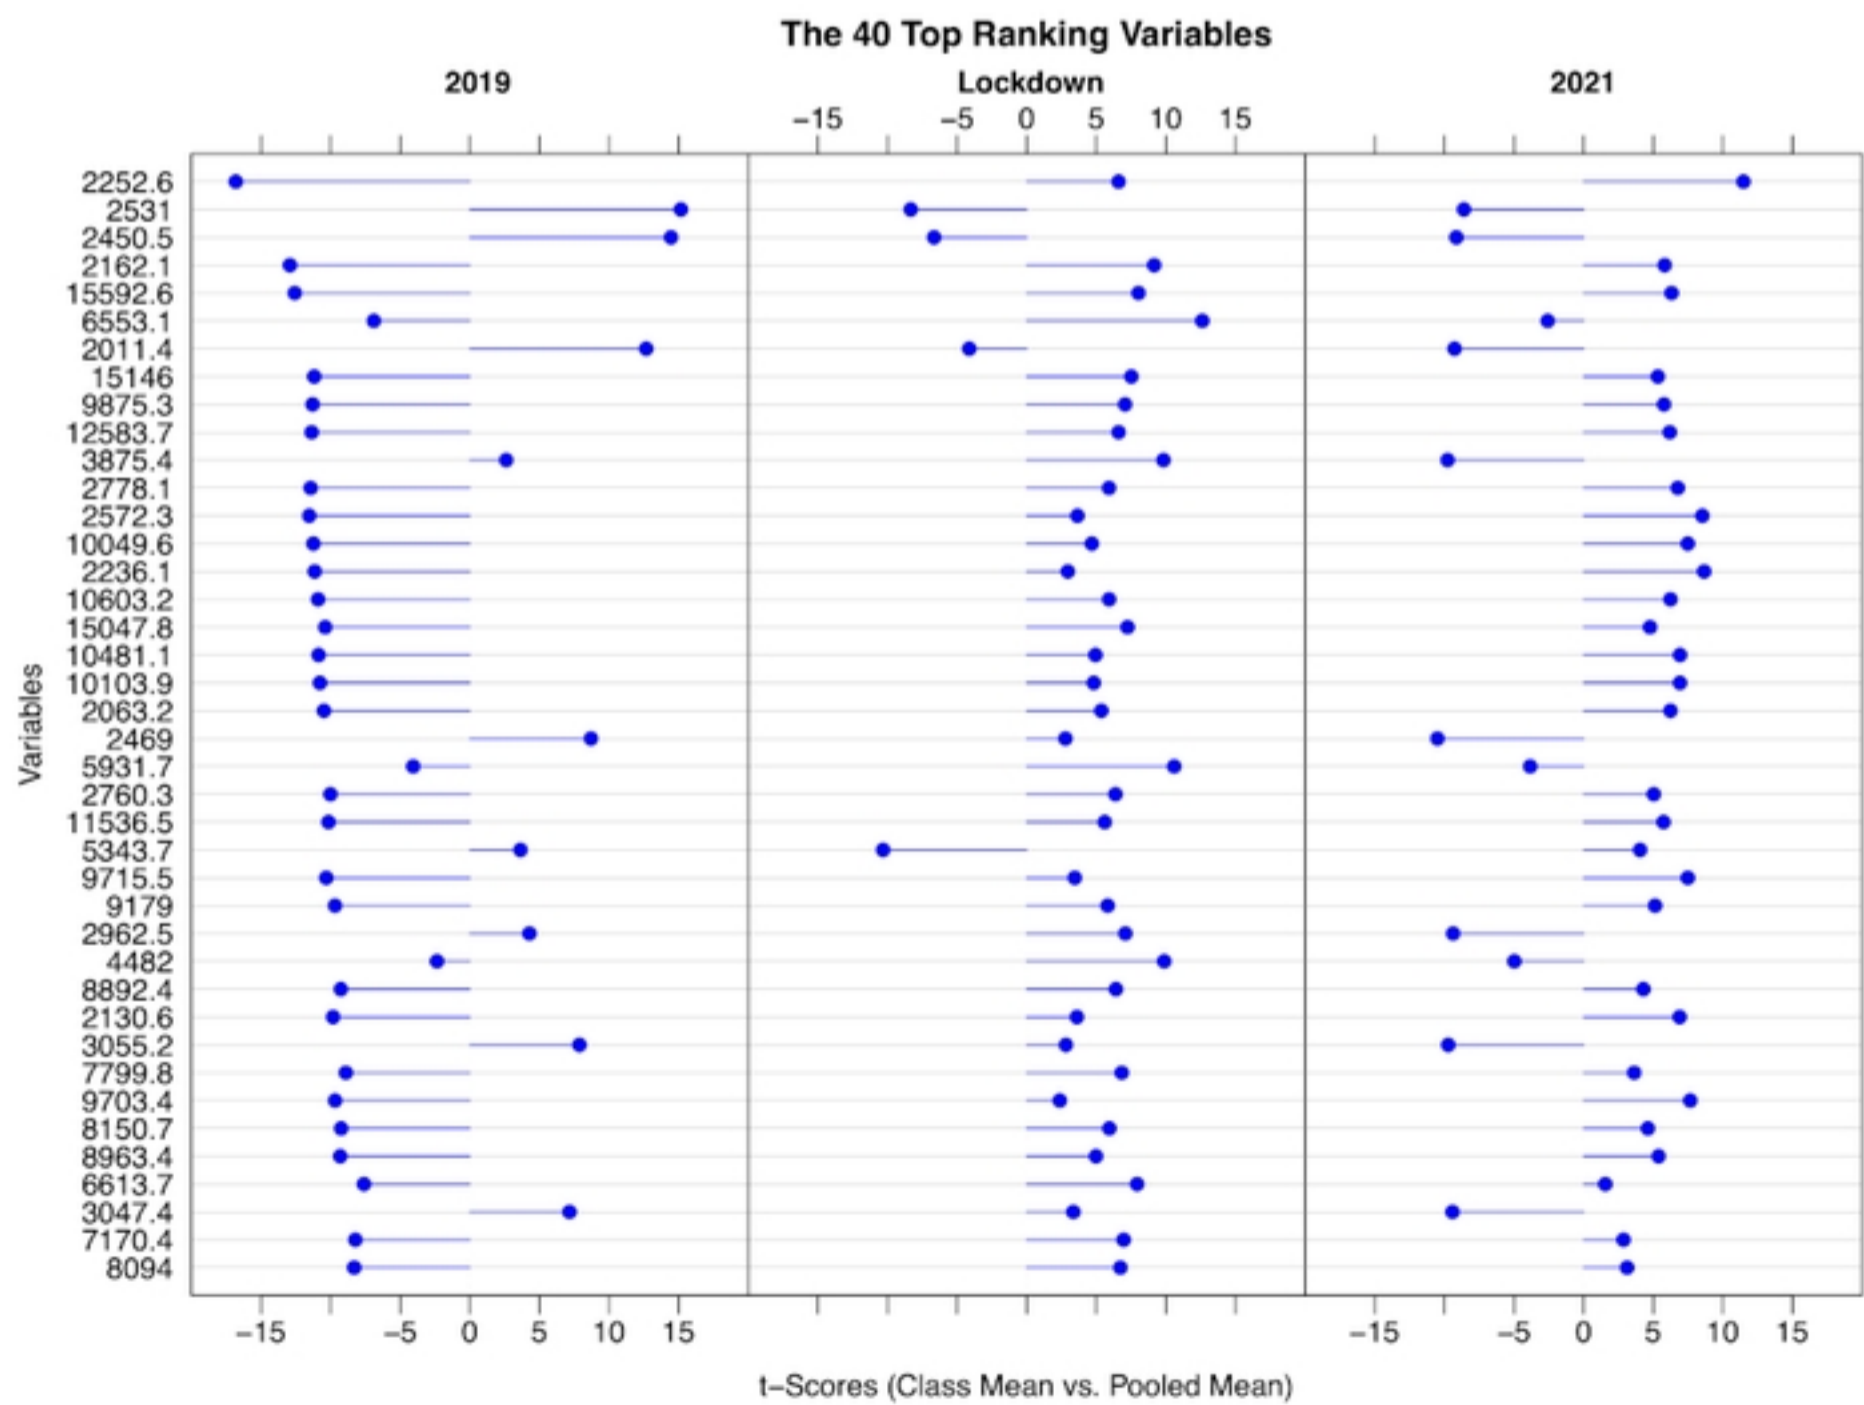

Figure4

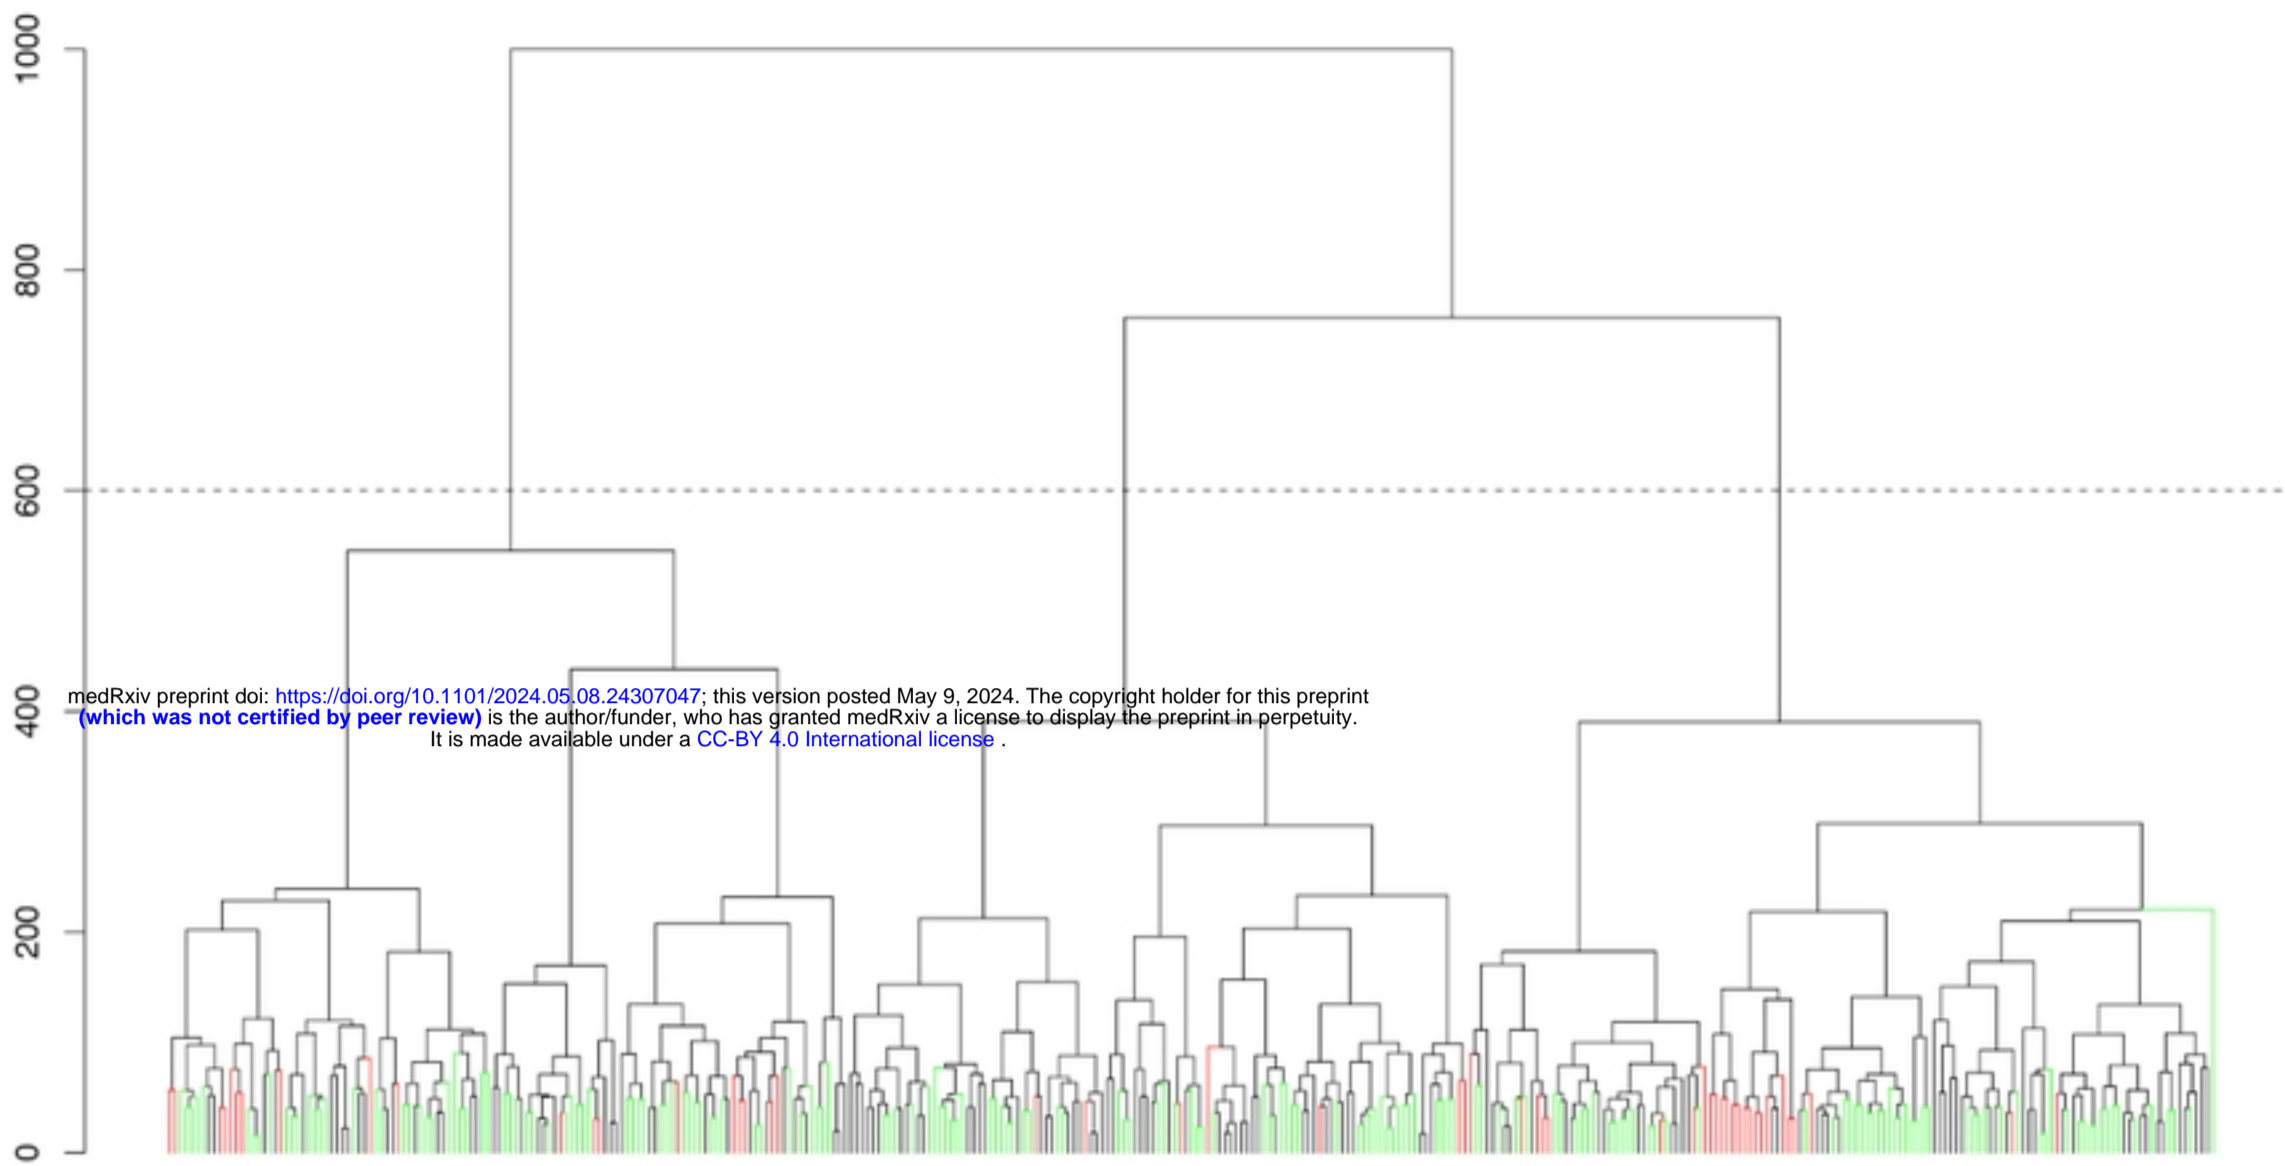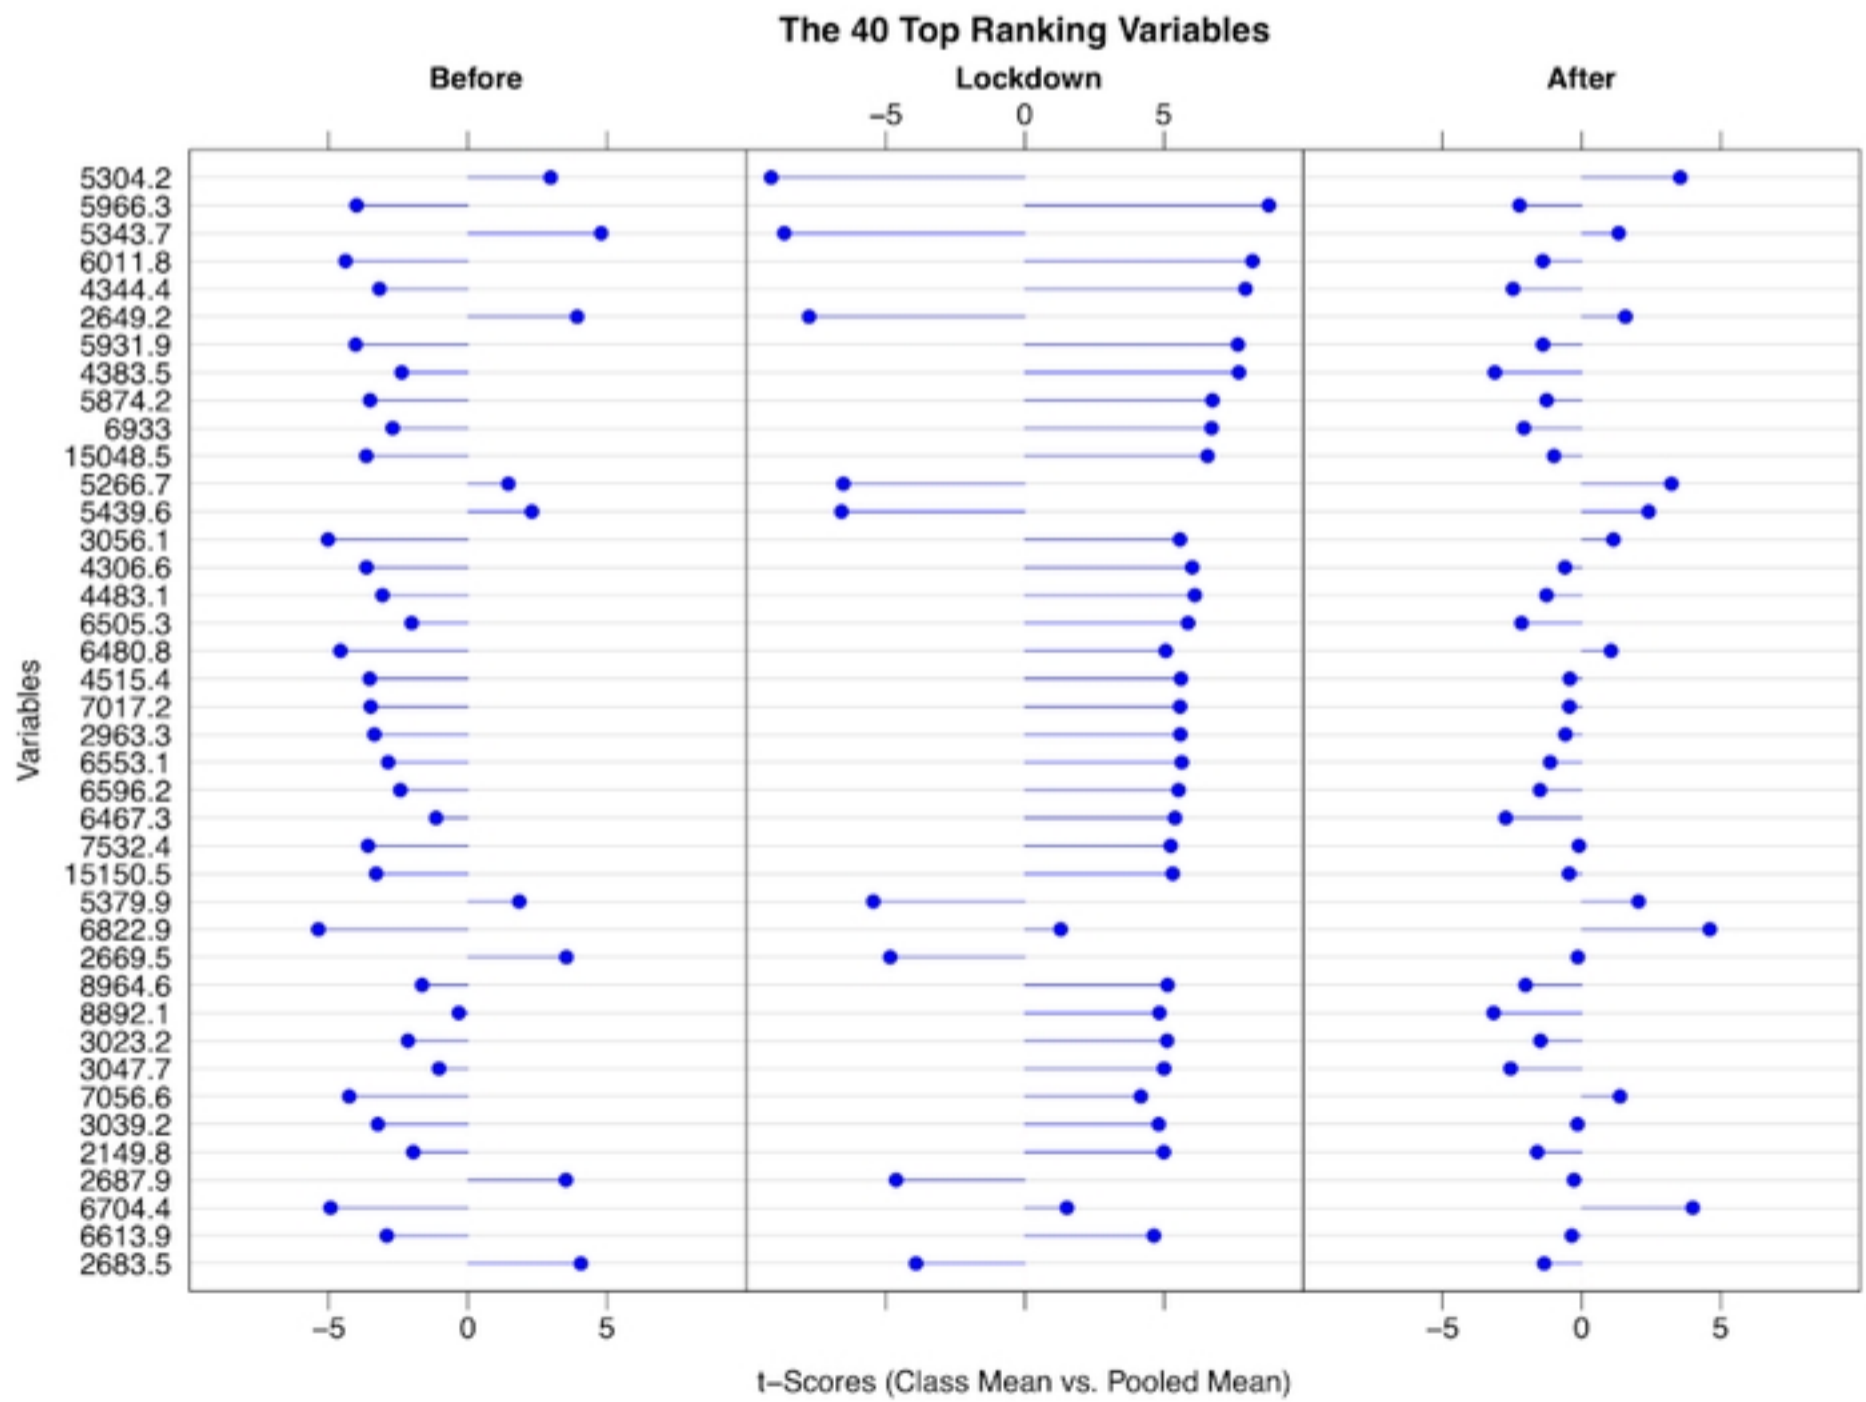

Figure5



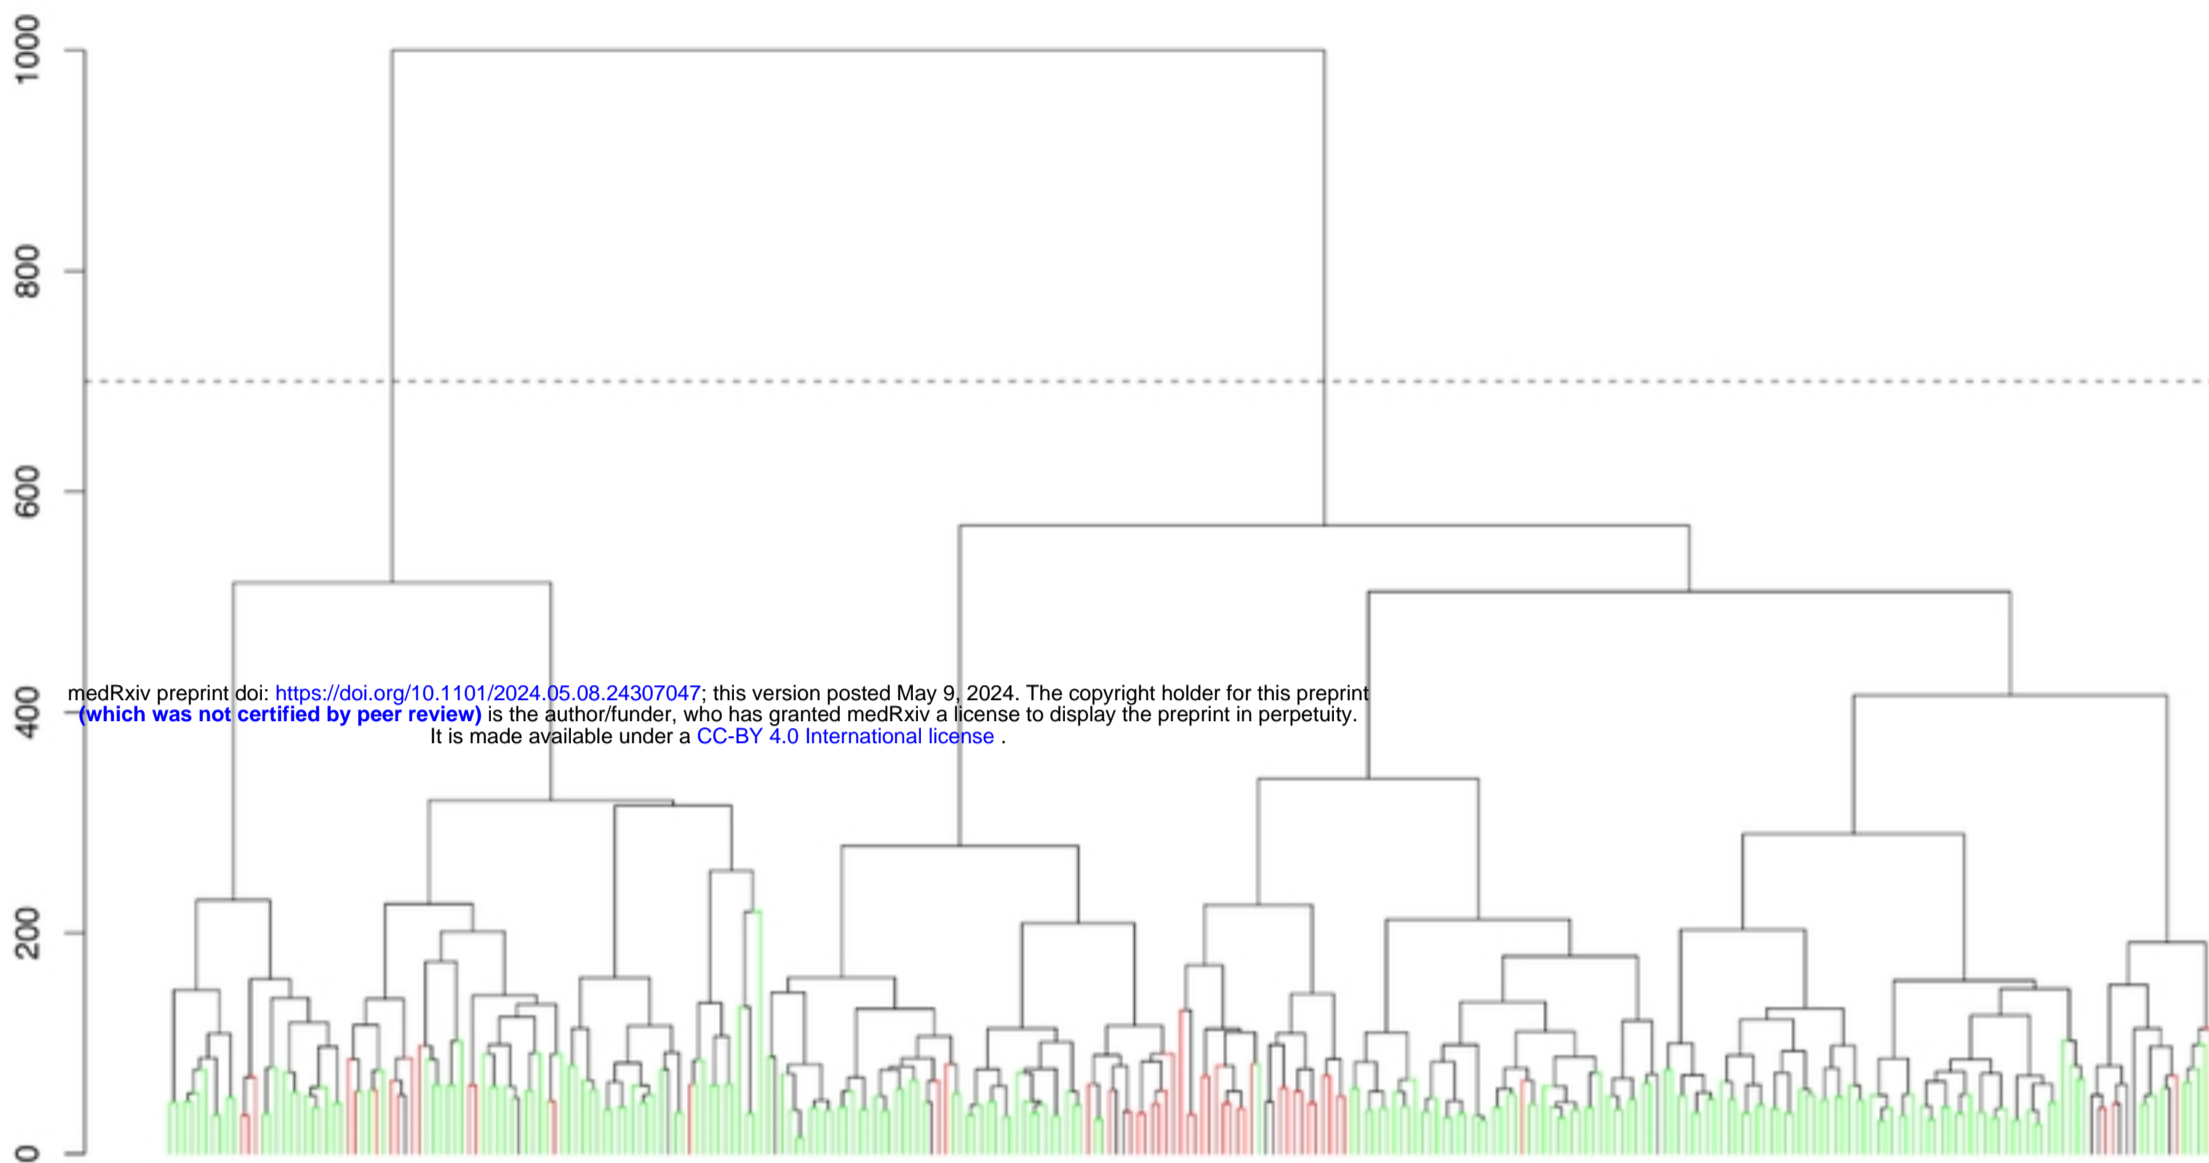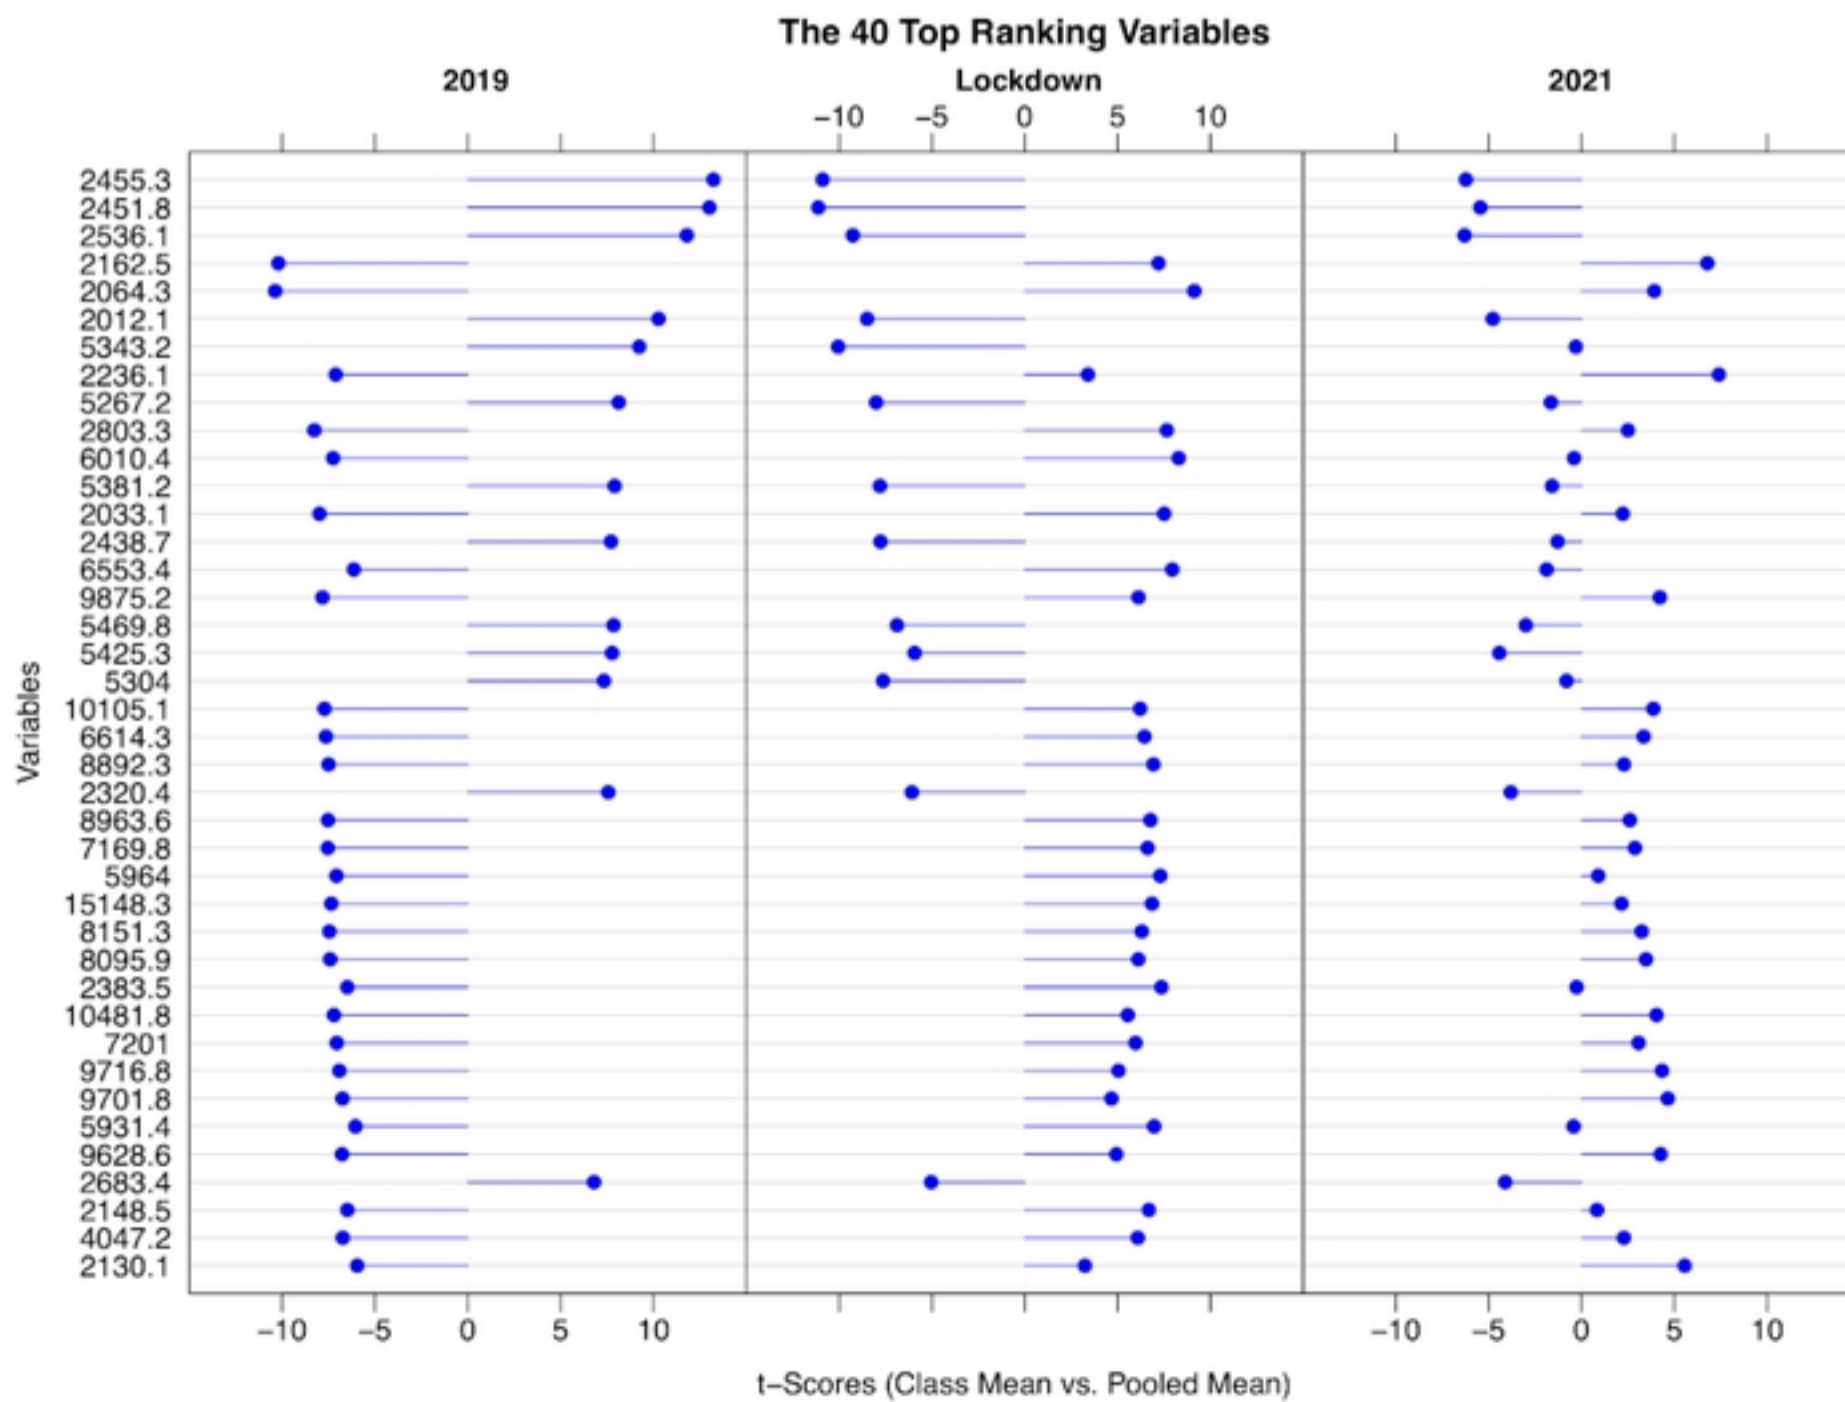

Figure6
